# Supplementary material for: Statin and dual antiplatelet therapy for the prevention of early neurological deterioration and recurrent stroke in branch atheromatous disease: a protocol for a prospective single-arm study using a historical control for comparison
Source: PubMed Central journal article supplement — BMJ Open. 2021 Nov 26;11(11):e054381. doi: 10.1136/bmjopen-2021-054381 (PMC8628334; doi:10.1136/bmjopen-2021-054381), 2021-11-26
Supplement: bmjopen-2021-054381.draft_revisions.pdf [file bmjopen-2021-054381.draft_revisions.pdf]

# BMJ Open

BMJ Open is committed to open peer review. As part of this commitment we make the peer review history of every article we publish publicly available.

When an article is published we post the peer reviewers' comments and the authors' responses online. We also post the versions of the paper that were used during peer review. These are the versions that the peer review comments apply to.

The versions of the paper that follow are the versions that were submitted during the peer review process. They are not the versions of record or the final published versions. They should not be cited or distributed as the published version of this manuscript.

BMJ Open is an open access journal and the full, final, typeset and author-corrected version of record of the manuscript is available on our site with no access controls, subscription charges or pay-per-view fees (<http://bmjopen.bmj.com>).

If you have any questions on BMJ Open's open peer review process please email [info.bmjopen@bmj.com](mailto:info.bmjopen@bmj.com)

# BMJ Open

## Statin and dual antiplatelet therapy for the prevention of early neurological deterioration and recurrent stroke in branch atheromatous disease (SATBRAD) - protocol for a prospective historically controlled study

|                               |                                                                                                                                                                                                                                                                                                                                                                                                                                                                                        |
|-------------------------------|----------------------------------------------------------------------------------------------------------------------------------------------------------------------------------------------------------------------------------------------------------------------------------------------------------------------------------------------------------------------------------------------------------------------------------------------------------------------------------------|
| Journal:                      | <i>BMJ Open</i>                                                                                                                                                                                                                                                                                                                                                                                                                                                                        |
| Manuscript ID                 | bmjopen-2021-054381                                                                                                                                                                                                                                                                                                                                                                                                                                                                    |
| Article Type:                 | Protocol                                                                                                                                                                                                                                                                                                                                                                                                                                                                               |
| Date Submitted by the Author: | 12-Jun-2021                                                                                                                                                                                                                                                                                                                                                                                                                                                                            |
| Complete List of Authors:     | Huang, Yen-Chu; Chiayi Chang Gung Memorial Hospital, Neurology<br>Lee, Jiann-Der; Chang Gung Memorial Hospital Chiayi Branch, Neurology<br>Weng, Hsu-Huei; Chang Gung Memorial Hospital Chiayi Branch, Diagnostic Radiology<br>Lin, Leng-Chieh; Chang Gung Memorial Hospital Chiayi Branch, Department of Emergency Medicine<br>Tsai, Yuan-Hsiung; Chang Gung Memorial Hospital Chiayi Branch, Radiology;<br>Yang, Jen-Tsung; Chang Gung Memorial Hospital Chiayi Branch, Neurosurgery |
| Keywords:                     | STROKE MEDICINE, VASCULAR MEDICINE, Magnetic resonance imaging < RADIOTHERAPY, Neuroradiology < NEUROLOGY, Stroke < NEUROLOGY                                                                                                                                                                                                                                                                                                                                                          |
|                               |                                                                                                                                                                                                                                                                                                                                                                                                                                                                                        |

SCHOLARONE™  
Manuscripts

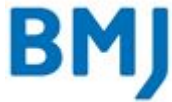

I, the Submitting Author has the right to grant and does grant on behalf of all authors of the Work (as defined in the below author licence), an exclusive licence and/or a non-exclusive licence for contributions from authors who are: i) UK Crown employees; ii) where BMJ has agreed a CC-BY licence shall apply, and/or iii) in accordance with the terms applicable for US Federal Government officers or employees acting as part of their official duties; on a worldwide, perpetual, irrevocable, royalty-free basis to BMJ Publishing Group Ltd ("BMJ") its licensees and where the relevant Journal is co-owned by BMJ to the co-owners of the Journal, to publish the Work in this journal and any other BMJ products and to exploit all rights, as set out in our [licence](#).

The Submitting Author accepts and understands that any supply made under these terms is made by BMJ to the Submitting Author unless you are acting as an employee on behalf of your employer or a postgraduate student of an affiliated institution which is paying any applicable article publishing charge ("APC") for Open Access articles. Where the Submitting Author wishes to make the Work available on an Open Access basis (and intends to pay the relevant APC), the terms of reuse of such Open Access shall be governed by a Creative Commons licence – details of these licences and which [Creative Commons](#) licence will apply to this Work are set out in our licence referred to above.

Other than as permitted in any relevant BMJ Author's Self Archiving Policies, I confirm this Work has not been accepted for publication elsewhere, is not being considered for publication elsewhere and does not duplicate material already published. I confirm all authors consent to publication of this Work and authorise the granting of this licence.

1  
2  
3  
4 **Statin and dual antiplatelet therapy for the prevention of early neurological**  
5 **deterioration and recurrent stroke in branch atheromatous disease (SATBRAD) -**  
6 **protocol for a prospective historically controlled study**  
7  
8  
9

10  
11  
12 Yen-Chu Huang<sup>1</sup>, MD; Jiann-Der Lee<sup>1</sup>, MD; Hsu-Huei Weng<sup>2</sup>, MD, MPH, PhD; Leng-Chieh Lin<sup>4</sup>,  
13 MD; Yuan-Hsiung Tsai<sup>2</sup>, MD, PhD; Jen-Tsung Yang<sup>3\*</sup>, MD, PhD.  
14  
15  
16

17  
18  
19 <sup>1</sup>Department of Neurology, <sup>2</sup>Department of Diagnostic Radiology, <sup>3</sup>Department of Neurosurgery and  
20 Department of Emergency Medicine<sup>4</sup>, Chang Gung Memorial Hospital at Chiayi, Chang-Gung  
21 University College of Medicine, Taiwan  
22  
23  
24  
25

26  
27  
28  
29 Word count: 3895  
30  
31  
32  
33  
34  
35  
36  
37  
38  
39  
40  
41  
42  
43  
44  
45  
46  
47

48 \* **Corresponding author:** Jen-Tsung Yang  
49

50 Department of Neurology, Chang Gung Memorial Hospital  
51 No. 6 West Chia-Pu Road, Putz City, Chiayi County, Taiwan  
52  
53

54 E-mail: [jents716@ms32.hinet.net](mailto:jents716@ms32.hinet.net)  
55

56  
57 Phone: +886 5 3621000 ext. 2759 Fax: +886 5 3623002  
58  
59  
60

## Abstract

### Introduction:

Branch atheromatous disease (BAD) contributes to small-vessel occlusion in cases of occlusion or stenosis of large caliber penetrating arteries, and it is associated with a higher possibility of early neurological deterioration (END) and recurrent stroke in acute ischemic stroke. As the pathology of BAD is due to atherosclerosis, we postulate that early intensive medical treatment with dual antiplatelet therapy (DAPT) and high-intensity statins, may prevent END and recurrent stroke in acute small subcortical infarction caused by BAD.

### Methods and analysis:

In this prospective, single-group cohort study, we will compare early DAPT and high-intensity statin treatment with a historical control group of BAD patients who were treated with single antiplatelet therapy without high-intensity statin treatment. Patients will be eligible for enrollment if they are admitted for acute ischemic stroke within 24h, have a National Institutes of Health Stroke Scale (NIHSS) score of 1-8 and are diagnosed with BAD by MRI. Patients will take aspirin, clopidogrel and high-intensity statins (atorvastatin or rosuvastatin) within 24h of stroke onset, followed by aspirin or clopidogrel alone from day 22. The primary endpoint is the percentage of patients who develop END within 7 days of stroke onset (defined as an increase in the NIHSS score  $\geq 2$  points) and recurrent stroke within 30 days. The total sample sizes will be 138 for the intervention group and 277 for the control group. A historical control group will be drawn from previous prospective observation studies.

### Ethics and dissemination:

The protocol of this study has been approved by the Institutional Review Board of Chang Gung Memorial Hospital (202001386A3). All participants will have to sign and date an informed consent form. The findings arising from this study will be disseminated in peer-reviewed journals and academic conferences.

1  
2  
3  
4 *Trial registration number:* ClinicalTrials.gov Identifier: NCT04824911  
5  
6  
7

8 Keywords: Statin, antiplatelet therapy, early neurological deterioration, recurrent stroke, branch  
9 atheromatous disease  
10  
11  
12  
13  
14

### 15 **Strengths and limitations of this study**

16

- 17 1. This will be the first trial to evaluate the effectiveness of dual antiplatelet therapy and high-  
18 intensity statins for the prevention of early neurological deterioration and recurrent stroke in  
19 patients with acute ischemic stroke from branch atheromatous disease.  
20  
21  
22
- 23 2. The findings will provide valuable information to increase understanding of the effectiveness of  
24 early intensive medical treatment for branch atheromatous disease after acute stage.  
25  
26  
27
- 28 3. A randomized controlled study with a parallel control arm receiving single antiplatelet treatment  
29 for milder stroke is against the latest guidelines so it's inevitable to conduct this trial with a  
30 historical control group.  
31  
32  
33
- 34 4. The use of a historical control group has the inherent drawbacks of nonrandomization and  
35 nonblinding so we cannot exclude the possibility of selection, performance, detection and  
36 attrition bias.  
37  
38  
39  
40  
41  
42  
43  
44  
45  
46  
47  
48  
49  
50  
51  
52  
53  
54  
55  
56  
57  
58  
59  
60

## 1. Introduction

Small-vessel occlusion is the most common stroke subtype in Asians; it is caused by the occlusion of deep perforating arteries, mainly by the underlying pathologies of lipohyalinosis or cerebral amyloid angiopathy.<sup>1,2</sup> Branch atheromatous disease (BAD) has also been reported to contribute to small-vessel occlusion in cases of occlusion or stenosis that occur at the origin of large caliber penetrating arteries, due to microatheromas or junctional atherosclerotic plaques.<sup>3</sup> BAD is associated with an increased possibility of early neurological deterioration (END) and recurrent stroke, especially progressive motor deficits, compared with infarction due to hypertensive arteriopathy.<sup>4-6</sup> It has been proposed that BAD should be classified as large artery atherosclerosis rather than small vessel occlusion.<sup>7</sup>

Following acute ischemic stroke, single antiplatelet agents, such as aspirin or clopidogrel, are the mainstay treatment for recurrent stroke prevention. However, the modest effects of single antiplatelet therapy led to the study of combination antiplatelet therapy for the prevention of recurrent stroke. The Clopidogrel in High-Risk Patients with Acute Nondisabling Cerebrovascular Events (CHANCE) and the Platelet-Oriented Inhibition in New TIA and Minor Ischemic Stroke (POINT) trials showed that dual antiplatelet therapy (DAPT) might be beneficial for reducing the probability of ischemic events in patients with high-risk transient ischemic attack (TIA) or minor stroke.<sup>8,9</sup> However, these studies included all non-embolic ischemic stroke types. Some studies also showed that DAPT reduced the possibility of END.<sup>10,11</sup> A retrospective observation study showed that DAPT was beneficial for the primary outcomes of stroke recurrence, myocardial infarction, and all-cause death in patients with large atherosclerotic stroke.<sup>12</sup>

For patients with acute ischemic stroke, the guidelines suggest starting or continuing statin treatment as soon as oral medications can be used safely.<sup>13</sup> Current guidelines also recommend high- or moderate-intensity statin therapy, independent of the baseline low-density lipoprotein cholesterol (LDL-C), to reduce the risk of stroke and cardiovascular events for patients with TIA or ischemic stroke of atherosclerotic origin.<sup>14</sup> High-dose statin treatment in the acute phase of ischemic stroke and TIA significantly reduced National Institutes of Health Stroke Scale (NIHSS) scores and improved

1  
2  
3  
4 short-term functional outcomes without increasing related adverse events<sup>15</sup>; it also effectively  
5  
6 stabilized symptomatic intracranial atherosclerotic plaques as documented by high-resolution MRI.<sup>16</sup>  
7

8 DAPT and high-intensity statins are the mainstay treatments for intracranial atherosclerosis  
9  
10 (ICAS).<sup>17</sup> As BAD and ICAS share the same pathology as atherosclerosis, we postulate that early  
11  
12 intensive medical treatment with DAPT and high-intensity statins may prevent early neurological  
13  
14 deterioration and recurrent stroke. This study aims to evaluate whether intensive medical therapy with  
15  
16 aspirin, clopidogrel and high-intensity statins, can prevent END and recurrent stroke in acute small  
17  
18 subcortical infarction caused by BAD.  
19  
20  
21  
22  
23

## 24 **2. Methods**

### 25 **2.1 Study Design**

26  
27  
28 In this prospective, non-randomized, historically controlled study, we will compare early  
29  
30 intensive treatment for BAD initiated within 24h of stroke onset, using dual antiplatelet therapy  
31  
32 (aspirin plus clopidogrel) and high-intensity statin treatment, with a historical control group of  
33  
34 BAD patients treated with single antiplatelet therapy, without high-intensity statin treatment.<sup>18 19</sup>  
35  
36 The study will be conducted in Chang Gung Memorial Hospital at Chiayi, Taiwan from March  
37  
38 2021 to Feb 2023.  
39  
40  
41

### 42 **2.2 Study population**

43  
44 Patients are eligible to participate if they meet the following inclusion criteria: (1) have a  
45  
46 clinical diagnosis of ischemic stroke with an NIHSS score of 1-8 (2) have an ischemic lesion on  
47  
48 diffuse-weighted imaging located in the striatocapsular territory or brain stem areas, with an axial  
49  
50 diameter  $\leq 20$ mm (3) have BAD, defined by a visible lesion in three or more axial MRI cuts in  
51  
52 the lenticulostriate territory or infarcts that extend from the basal surface of the pons (4) could  
53  
54 receive intensive medical treatment within 24h of stroke onset. Patients with  $>50\%$  stenosis of  
55  
56 the relevant arteries on magnetic resonance angiography (MRA), including intra- or extra-cranial  
57  
58 internal carotid artery, middle cerebral artery or basilar artery, will be excluded. We will also  
59  
60



1  
2  
3  
4 exclude patients at high risk of cardioembolic stroke, such as those with atrial fibrillation or heart  
5 failure. Full details of the inclusion and exclusion criteria are listed in Table 1.  
6  
7

8 A historical control group will be drawn from our prospective observation studies, which  
9 have been executed between January 2011 and December 2020, and aimed to evaluate and predict  
10 END or atrial fibrillation.<sup>18 19</sup> Patients will be selected if they fulfill the following inclusion  
11 criteria: took aspirin or clopidogrel alone and did not receive high-intensity statin treatment.  
12 Patients in the historical control group will have received statin treatment once their total  
13 cholesterol was  $\geq 160$ mg/dl or their LDL-C was  $\geq 100$ mg/dl. High-intensity statin treatment  
14 includes atorvastatin 40–80mg or rosuvastatin 20–40mg daily.<sup>20</sup> All clinical information and  
15 outcomes have been prospectively recorded.  
16  
17  
18  
19  
20  
21  
22  
23  
24  
25

### 26 **2.3 Trial intervention**

27  
28 Dual antiplatelet and high-intensity statin treatment will be administered within 24h of stroke  
29 onset (Figure 1). Dual antiplatelet treatment includes aspirin (300mg loading and 100mg/day) and  
30 clopidogrel (300mg loading and 75mg/day) and high-intensity statins includes atorvastatin 40-  
31 80mg/day or rosuvastatin 20mg/day. Patients will take aspirin and clopidogrel for 21 days and  
32 then just take aspirin or clopidogrel alone. High-intensity statins will be maintained for 90 days  
33 but a decreased dose is allowed if any side effects occur, including elevated liver functions,  
34 elevated creatine-phospho-kinase (CPK) and myalgia or at the judgment of the treating physician.  
35 We will follow up with alanine aminotransferase (ALT) and CPK 14 days after treatment and  
36 will follow up with ALT, CPK and LDL-C 90 days after treatment. Patients with atherosclerotic  
37 plaques in the first MRI will keep high-intensity statin treatment for 6 months.  
38  
39  
40  
41  
42  
43  
44  
45  
46  
47  
48  
49

50  
51 Neurological deficits will be evaluated by a stroke study nurse using the NIHSS, at the 1<sup>st</sup>,  
52 2<sup>nd</sup>, 3<sup>rd</sup>, 7<sup>th</sup> and 90<sup>th</sup> day. As END in lacunar infarction is mainly associated with motor deficits,  
53 END is defined as an NIHSS score increase  $\geq 2$  within 7 days of stroke onset.<sup>21</sup> Clinical outcomes  
54 at admission and at 90 days will be evaluated using the modified Rankin Scale (mRS). A good  
55 outcome is defined as an mRS score  $\leq 1$ . Mortality at 3 months and any hemorrhagic complications  
56  
57  
58  
59  
60

1  
2  
3  
4 will also be recorded. All examinations will be performed after obtaining written informed  
5  
6 consent from the patients or the appropriate family members.  
7

8 Patients with visible atheromatous plaques in the parental artery in the initial MRI will  
9  
10 receive a follow-up MRI 6 months later to see the interval changes in atheromatous plaques.  
11

## 12 13 **2.4 Study Outcomes**

14  
15 The primary outcome will be the percentage of patients with early neurological deterioration  
16  
17 within 7 days and recurrent ischemic stroke within 30 days. Secondary outcomes will include: (1)  
18  
19 the percentage of patients with favorable functional recovery, defined as an mRS  $\leq 1$  at the 90<sup>th</sup>  
20  
21 day, (2) the percentage of patients with new clinical vascular events within 90 days, including  
22  
23 ischemic stroke, hemorrhagic stroke, TIA, myocardial infarction and vascular death, (3) changes  
24  
25 in atherosclerotic plaques, which will be measured by high-resolution MRI at the start of the study  
26  
27 and after 6 months, (4) the number of moderate to severe bleeding events as defined by the  
28  
29 GUSTO classification,<sup>22</sup> and (5) the total mortality rate.  
30  
31

## 32 33 **2.5 Sample Size**

34  
35 In single subcortical infarction, END was reported to occur frequently in BAD with an incidence  
36  
37 of 27% in our previous cohort and 33.8- 40% in other studies.<sup>10 23</sup> The END rate may decrease to  
38  
39 9.7% in patients with BAD who underwent combination antiplatelet therapy with cilostazol.<sup>10</sup>  
40  
41 The total sample sizes will be 138 for the intervention group and 277 for the control group. The  
42  
43 estimated END rate is 27% for the control group and 15% for the intervention group, with 80%  
44  
45 power and a two-sided alpha of 0.05. The intent-to-treat (ITT) principle will be applied to the  
46  
47 primary outcome analysis, and the sample size was therefore inflated to safeguard against 5%  
48  
49 lost-to-follow-up in the actual treatment groups, which could dilute the effect size.  
50  
51

## 52 53 **2.6 Statistical analysis**

54  
55 Statistical analyses will be performed using the Statistical Package for the Social Sciences  
56  
57 (SPSS) statistical software (version 25, Chicago, IL, USA). The Kolmogorov-Smirnov test will  
58  
59 be used to examine the normality of continuous variables. The Mann-Whitney U test and  
60

1  
2  
3  
4 Student's t-test will be used to test for differences between the two groups, as appropriate.  
5  
6 Categorical data will be analyzed using the Chi-squared test. A logistic regression model will be  
7  
8 used to adjust for baseline confounding factors and to test independent variables for the measured  
9  
10 outcomes. Variables showing a p value of  $<0.1$  for univariate analysis will be entered into the  
11  
12 multivariate logistic analysis using the forward selection method. All tests will be two-tailed, and  
13  
14 a p value  $<0.05$  is considered to indicate a statistically significant difference.  
15  
16

## 17 **2.7 Data management**

18  
19 All the completed documents and the informed consent forms will be stored in a secured  
20  
21 facility, under lock and key. The database for clinical data will be created using Access software  
22  
23 and the access will be limited to principal investigators. A study steering committee will be  
24  
25 established to ensure that the study conducted to the required standards. The clinical research  
26  
27 assistant will verify all consent forms, compliance with study protocol and procedures, and data  
28  
29 quality. The research team will make half-yearly reports to the study steering committee. All the  
30  
31 records and documents will be kept for 7 years after the completion of the study.  
32  
33  
34

## 35 **2.8 Adverse events**

36  
37 Any adverse events that occur during the conduct of the study will be reported to the Domain  
38  
39 Specific Research Board (DSRB) according to the local institutional policy. Interim analyses will  
40  
41 be conducted by the study steering committee to monitor the accumulating data and to decide  
42  
43 continuing or stopping the trial.  
44  
45

## 46 **2.9 Patient and public involvement:**

47  
48 Patients and members from stroke associations participated in the preparation and formulation of  
49  
50 this proposal. Patients with acute ischemic stroke from BAD will be involved in the trial. The  
51  
52 associations will be involved in plans to disseminate the study results to their members and wider  
53  
54 patient communities.  
55  
56

## 57 **2.10 Ethics and dissemination:**

58  
59 The protocol of this study has been approved by the Institutional Review Board of Chang Gung  
60

1  
2  
3  
4 Memorial Hospital (202001386A3). The study is registered on ClinicalTrials.gov  
5 (NCT04824911). All participants will have to sign and date an informed consent form. The  
6  
7 findings arising from this study will be disseminated in peer-reviewed journals and academic  
8  
9 conferences. The datasets during the current study are available from the corresponding author  
10  
11 on reasonable request.  
12  
13

### 14 15 **3. Discussion**

16  
17 This will be the first trial to evaluate the effectiveness of DAPT and high-intensity statins for the  
18 prevention of early neurological deterioration and recurrent stroke in patients with acute ischemic  
19 stroke from BAD. With improvements in imaging, BAD is believed to be caused by atherosclerotic  
20 plaques which obstruct the orifices of penetrators<sup>3 24</sup> and it has been proposed that BAD should be  
21 classified as large artery atherosclerosis rather than small vessel occlusion.<sup>7</sup> DAPT and high-intensity  
22 statins are the mainstay treatments for ICAS.<sup>17</sup> Since ICAS and BAD share the same pathology of  
23 atherosclerosis, the treatment of DAPT and high-intensity statins may also be effective for BAD. The  
24 results of this trial will answer the question of whether optimal treatment for BAD is different from  
25 other small subcortical infarction due to other pathologies.  
26  
27  
28  
29  
30  
31  
32  
33  
34  
35  
36

37 In this trial, we define BAD as a visible lesion in three or more axial MRI cuts in the  
38 lenticulostriate territory or infarcts that extend from the basal surface of the pons.<sup>3</sup> Although high-  
39 resolution vessel-wall MRIs provide a direct way of detecting atherosclerotic plaques involving  
40 perforators' parent arteries, the definition in this trial is a more practical way of stroke diagnosis. In  
41 addition, microatheroma in the proximal penetrating artery are not visible in vessel-wall imaging and  
42 need other advanced sequences to be detected, which may prohibit its widespread use.  
43  
44  
45  
46  
47  
48  
49  
50

51 Our primary outcome is the percentage of patients with END within 7 days and recurrent ischemic  
52 stroke within 30 days, which often lead to greater mortality and functional disability. It is therefore  
53 worth evaluating any treatment which could lower END and recurrent stroke. In the secondary  
54 outcomes, we will evaluate the changes in atherosclerotic plaques on parental arteries as measured by  
55 an initial high-resolution MRI and another 6 months later. To the best of our knowledge, it will be the  
56  
57  
58  
59  
60

1  
2  
3  
4 first trial to demonstrate plaque changes in BAD after medical treatment.  
5

6       There are several methodological limitations of this trial. The use of a historical control group has  
7  
8 the inherent drawbacks of nonrandomization and nonblinding so we cannot exclude the possibility of  
9  
10 selection, performance, detection and attrition bias. However, using a single antiplatelet agent for  
11  
12 milder stroke with an NIHSS score  $\leq 3$  is against the guidelines and there would be ethical issues if we  
13  
14 conducted a randomized controlled study with a parallel control arm receiving single antiplatelet  
15  
16 treatment. Therefore, our study still provides valuable information to increase understanding of the  
17  
18 effectiveness of DAPT and statins in acute small subcortical infarction from BAD.  
19  
20  
21  
22  
23

### 24 **Author contributions**

25  
26 YCH and JTY conceptualized and designed the initial protocol. JDL, LCL, HHW and YHT amended  
27  
28 the initial protocol. YCH drafted the manuscript and received the fund. All authors read and approved  
29  
30 of the protocol prior to submission.  
31  
32  
33  
34

### 35 **Funding**

36  
37 This work was supported by Chang Gung Memorial Hospital research grants (CORPG6K0161).  
38  
39  
40  
41

### 42 **Competing interests**

43  
44 None declared.  
45  
46  
47  
48

### 49 **Provenance and peer review**

50  
51 Not commissioned; externally peer reviewed.  
52  
53  
54  
55  
56  
57  
58  
59  
60

## References

1. Charidimou A, Pantoni L, Love S. The concept of sporadic cerebral small vessel disease: A road map on key definitions and current concepts. *Int J Stroke* 2016;11:6-18.
2. Kim BJ, Kim JS. Ischemic stroke subtype classification: an asian viewpoint. *J Stroke* 2014;16:8-17.
3. Petrone L, Nannoni S, Del Bene A, et al. Branch Atheromatous Disease: A Clinically Meaningful, Yet Unproven Concept. *Cerebrovasc Dis* 2016;41:87-95.
4. Yamamoto Y, Ohara T, Hamanaka M, et al. Characteristics of intracranial branch atheromatous disease and its association with progressive motor deficits. *J Neurol Sci* 2011;304:78-82.
5. Kim JS, Yoon Y. Single subcortical infarction associated with parental arterial disease: important yet neglected sub-type of atherothrombotic stroke. *Int J Stroke* 2013;8:197-203.
6. Ko Y, Lee S, Chung JW, et al. MRI-based Algorithm for Acute Ischemic Stroke Subtype Classification. *J Stroke* 2014;16:161-72.
7. Gao S, Wang YJ, Xu AD, et al. Chinese ischemic stroke subclassification. *Front Neurol* 2011;2:6.
8. Johnston SC, Easton JD, Farrant M, et al. Clopidogrel and Aspirin in Acute Ischemic Stroke and High-Risk TIA. *N Engl J Med* 2018;379:215-25.
9. Wang Y, Wang Y, Zhao X, et al. Clopidogrel with aspirin in acute minor stroke or transient ischemic attack. *N Engl J Med* 2013;369:11-9.
10. Kimura T, Tucker A, Sugimura T, et al. Ultra-Early Combination Antiplatelet Therapy with Cilostazol for the Prevention of Branch Atheromatous Disease: A Multicenter Prospective Study. *Cerebrovasc Dis Extra* 2016;6:84-95.
11. Wang C, Yi X, Zhang B, et al. Clopidogrel plus aspirin prevents early neurologic deterioration and improves 6-month outcome in patients with acute large artery atherosclerosis stroke. *Clin Appl Thromb Hemost* 2015;21:453-61.
12. Kim D, Park JM, Kang K, et al. Dual Versus Mono Antiplatelet Therapy in Large Atherosclerotic Stroke. *Stroke* 2019;50:1184-92.
13. Grundy SM, Stone NJ, Bailey AL, et al. 2018 AHA/ACC/AACVPR/AAPA/ABC/ACPM/ADA/AGS/APHA/ASPC/NLA/PCNA Guideline on the Management of Blood Cholesterol: A Report of the American College of Cardiology/American Heart Association Task Force on Clinical Practice Guidelines. *Circulation* 2019;139:e1082-e143.
14. Stone NJ, Robinson JG, Lichtenstein AH, et al. 2013 ACC/AHA guideline on the treatment of blood cholesterol to reduce atherosclerotic cardiovascular risk in adults: a report of the American College of Cardiology/American Heart Association Task Force on Practice Guidelines. *Circulation* 2014;129:S1-45.
15. Fang JX, Wang EQ, Wang W, et al. The efficacy and safety of high-dose statins in acute phase of ischemic stroke and transient ischemic attack: a systematic review. *Intern Emerg Med* 2017;12:679-87.
16. Chung JW, Cha J, Lee MJ, et al. Intensive Statin Treatment in Acute Ischaemic Stroke Patients

- 1  
2  
3 with Intracranial Atherosclerosis: a High-Resolution Magnetic Resonance Imaging study  
4 (STAMINA-MRI Study). *J Neurol Neurosurg Psychiatry* 2020;91:204-11.  
5  
6 17. Liu D, Liu J, Cai Y, et al. Is the future of symptomatic intracranial atherosclerotic stenosis  
7 management promising? *J Neurol Neurosurg Psychiatry* 2020;91:122-24.  
8  
9 18. Huang WY, Lee M, Sung SF, et al. Atrial fibrillation trial to evaluate real-world procedures for  
10 their utility in helping to lower stroke events: A randomized clinical trial. *Int J Stroke*  
11 2021;16:300-10.  
12  
13 19. Huang YC, Tsai YH, Lee JD, et al. A Novel Neuroimaging Model to Predict Early Neurological  
14 Deterioration After Acute Ischemic Stroke. *Curr Neurovasc Res* 2018;15:129-37.  
15  
16 20. Collins R, Reith C, Emberson J, et al. Interpretation of the evidence for the efficacy and safety of  
17 statin therapy. *Lancet* 2016;388:2532-61.  
18  
19 21. Siegler JE, Martin-Schild S. Early Neurological Deterioration (END) after stroke: the END depends  
20 on the definition. *Int J Stroke* 2011;6:211-2.  
21  
22 22. Mehran R, Rao SV, Bhatt DL, et al. Standardized bleeding definitions for cardiovascular clinical  
23 trials: a consensus report from the Bleeding Academic Research Consortium. *Circulation*  
24 2011;123:2736-47.  
25  
26 23. van Rooij WJ, Sprengers ME, de Gast AN, et al. 3D rotational angiography: the new gold  
27 standard in the detection of additional intracranial aneurysms. *AJNR Am J Neuroradiol*  
28 2008;29:976-9.  
29  
30 24. Jiang S, Wu S, Zhang S, et al. Advances in Understanding the Pathogenesis of Lacunar Stroke:  
31 From Pathology and Pathophysiology to Neuroimaging. *Cerebrovasc Dis* 2021:1-9.  
32  
33  
34  
35  
36  
37  
38  
39  
40  
41  
42  
43  
44  
45  
46  
47  
48  
49  
50  
51  
52  
53  
54  
55  
56  
57  
58  
59  
60

1  
2  
3  
4 **Figure 1.** A schematic diagram of the treatment schedule and study design.  
5

6 In the intervention group, patients will take aspirin (300mg loading and 100mg/day), clopidogrel  
7  
8 (300mg loading and 75mg/day) and high-intensity statins (atorvastatin 40-80mg/day or rosuvastatin  
9  
10 20mg/day) within 24h of stroke onset, followed by aspirin or clopidogrel alone from day 22. High-  
11  
12 intensity statins includes atorvastatin 40-80mg/day or rosuvastatin 20mg/day. In the historical control  
13  
14 group, patients will be selected from previous prospective studies if they fulfill the following inclusion  
15  
16 criteria: took aspirin or clopidogrel alone and did not receive high-intensity statin treatment.  
17  
18  
19  
20  
21  
22  
23  
24  
25  
26  
27  
28  
29  
30  
31  
32  
33  
34  
35  
36  
37  
38  
39  
40  
41  
42  
43  
44  
45  
46  
47  
48  
49  
50  
51  
52  
53  
54  
55  
56  
57  
58  
59  
60



**Table 1.** Inclusion and exclusion criteria (Issue date: 01 Sep 2020)**Inclusion Criteria**

- Clinical diagnosis of ischemic stroke with a National Institute of Health Stroke Scale (NIHSS) score of 1-8
- An ischemic lesion on diffuse-weighted imaging located in the striatocapsular territory or brain stem areas, with an axial diameter  $\leq 20$ mm.
- Branch atheromatous disease, defined by a visible lesion in three or more axial MRI cuts in the lenticulostriate territory or infarcts that extend from the basal surface of the pons
- Ability to participate within 24h of the time of last known free of new ischemic symptoms.
- Head MRI ruling out hemorrhage or other pathologies, such as vascular malformation, tumor, or abscess, that could explain their symptoms or contraindicate therapy.
- Ability to tolerate high intensity medical therapy, including aspirin at a dose of 50–325mg/day, clopidogrel at 300mg loading and 75mg after day 2 and high-intensity statins (either atorvastatin 40-80mg or rosuvastatin 20mg/day).
- Pre-stroke mRS  $\leq 1$

**Exclusion Criteria**

- Age <18 years.
- At the judgment of the treating physician
- A candidate for thrombolysis, endarterectomy or endovascular intervention.
- Receipt of any intravenous or intra-arterial thrombolysis within 1 week prior to the index event.
- Patients with >50% stenosis of the relevant arteries as determined by magnetic resonance angiography (MRA), including the intra- or extra-cranial internal carotid artery, middle cerebral artery or basilar artery.
- Patients with a high risk of cardioembolic stroke, such as those with atrial fibrillation, acute myocardial infarction, severe heart failure or valvular heart disease.
- Those with other determined stroke etiologies, such as vasculitis, shock, antiphospholipid antibody syndrome etc.
- Gastrointestinal bleeding or major surgery within 3 months prior to the index event.
- History of nontraumatic intracranial hemorrhage.
- Clear indication for anticoagulation during the study period (deep venous thrombosis, pulmonary embolism or hypercoagulable state).
- Qualifying ischemic event induced by angiography or surgery.
- Severe non-cardiovascular comorbidity with a life expectancy <3 months.
- Contraindication to clopidogrel, aspirin, atorvastatin or rosuvastatin
  - Known allergy to clopidogrel, aspirin atorvastatin or rosuvastatin
  - Severe renal (serum creatinine >2 mg/dL) or hepatic insufficiency (INR >1.2; ALT >40 U/L or any

- 
- resultant complication, such as variceal bleeding, encephalopathy, or jaundice)
- Hemostatic disorder or systemic bleeding in the past 3 months
  - Current thrombocytopenia (platelet count  $<100 \times 10^9/L$ ) or leukopenia ( $<2 \times 10^9/L$ )
  - History of drug-induced hematologic or hepatic abnormalities
- Anticipated requirement for long-term ( $>7$  day) non-study antiplatelet drugs (e.g., dipyridamole, ticagrelor, ticlopidine), or NSAIDs.
  - Not willing or able to discontinue prohibited concomitant medications.
  - Women of childbearing age not practicing reliable contraception who do not have a documented negative pregnancy test.
  - Other neurological conditions that would complicate assessment of outcomes during follow-up.
  - Ongoing treatment in another study of an investigational therapy, or treatment in such a study within the last 7 days.
-

1  
2  
3  
4  
5  
6  
7  
8  
9  
10  
11  
12  
13  
14  
15  
16  
17  
18  
19  
20  
21  
22  
23  
24  
25  
26  
27  
28  
29  
30  
31  
32  
33  
34  
35  
36  
37  
38  
39  
40  
41  
42  
43  
44  
45  
46  
47  
48  
49  
50  
51  
52  
53  
54  
55  
56  
57  
58  
59  
60

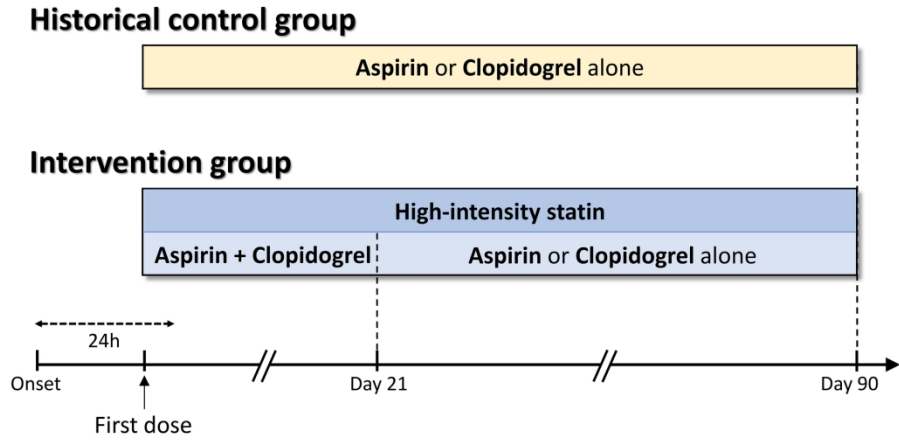

Figure 1/ A schematic diagram of the treatment schedule and study design

199x109mm (300 x 300 DPI)

# Reporting checklist for protocol of a clinical trial.

Based on the SPIRIT guidelines.

## Instructions to authors

Complete this checklist by entering the page numbers from your manuscript where readers will find each of the items listed below.

Your article may not currently address all the items on the checklist. Please modify your text to include the missing information. If you are certain that an item does not apply, please write "n/a" and provide a short explanation.

Upload your completed checklist as an extra file when you submit to a journal.

In your methods section, say that you used the SPIRIT reporting guidelines, and cite them as:

Chan A-W, Tetzlaff JM, Gøtzsche PC, Altman DG, Mann H, Berlin J, Dickersin K, Hróbjartsson A, Schulz KF, Parulekar WR, Krleža-Jerić K, Laupacis A, Moher D. SPIRIT 2013 Explanation and Elaboration: Guidance for protocols of clinical trials. *BMJ*. 2013;346:e7586

|                                   |                                                                                                                                 | Page   |
|-----------------------------------|---------------------------------------------------------------------------------------------------------------------------------|--------|
|                                   | Reporting Item                                                                                                                  | Number |
| <b>Administrative information</b> |                                                                                                                                 |        |
| Title                             | <a href="#">#1</a> Descriptive title identifying the study design, population, interventions, and, if applicable, trial acronym | 1      |

|    |                     |                     |                                                            |    |
|----|---------------------|---------------------|------------------------------------------------------------|----|
| 1  | Trial registration  | <a href="#">#2a</a> | Trial identifier and registry name. If not yet registered, | 3  |
| 2  |                     |                     | name of intended registry                                  |    |
| 3  |                     |                     |                                                            |    |
| 4  |                     |                     |                                                            |    |
| 5  |                     |                     |                                                            |    |
| 6  | Trial registration: | <a href="#">#2b</a> | All items from the World Health Organization Trial         | 3  |
| 7  |                     |                     |                                                            |    |
| 8  | data set            |                     | Registration Data Set                                      |    |
| 9  |                     |                     |                                                            |    |
| 10 |                     |                     |                                                            |    |
| 11 |                     |                     |                                                            |    |
| 12 | Protocol version    | <a href="#">#3</a>  | Date and version identifier                                | 14 |
| 13 |                     |                     |                                                            |    |
| 14 |                     |                     |                                                            |    |
| 15 | Funding             | <a href="#">#4</a>  | Sources and types of financial, material, and other        | 10 |
| 16 |                     |                     | support                                                    |    |
| 17 |                     |                     |                                                            |    |
| 18 |                     |                     |                                                            |    |
| 19 |                     |                     |                                                            |    |
| 20 | Roles and           | <a href="#">#5a</a> | Names, affiliations, and roles of protocol contributors    | 10 |
| 21 |                     |                     |                                                            |    |
| 22 | responsibilities:   |                     |                                                            |    |
| 23 |                     |                     |                                                            |    |
| 24 | contributorship     |                     |                                                            |    |
| 25 |                     |                     |                                                            |    |
| 26 |                     |                     |                                                            |    |
| 27 |                     |                     |                                                            |    |
| 28 | Roles and           | <a href="#">#5b</a> | Name and contact information for the trial sponsor         | 1  |
| 29 |                     |                     |                                                            |    |
| 30 | responsibilities:   |                     |                                                            |    |
| 31 |                     |                     |                                                            |    |
| 32 | sponsor contact     |                     |                                                            |    |
| 33 |                     |                     |                                                            |    |
| 34 | information         |                     |                                                            |    |
| 35 |                     |                     |                                                            |    |
| 36 |                     |                     |                                                            |    |
| 37 |                     |                     |                                                            |    |
| 38 | Roles and           | <a href="#">#5c</a> | Role of study sponsor and funders, if any, in study        | 10 |
| 39 |                     |                     | design; collection, management, analysis, and              |    |
| 40 | responsibilities:   |                     | interpretation of data; writing of the report; and the     |    |
| 41 |                     |                     | decision to submit the report for publication, including   |    |
| 42 | sponsor and funder  |                     | whether they will have ultimate authority over any of      |    |
| 43 |                     |                     | these activities                                           |    |
| 44 |                     |                     |                                                            |    |
| 45 |                     |                     |                                                            |    |
| 46 |                     |                     |                                                            |    |
| 47 |                     |                     |                                                            |    |
| 48 |                     |                     |                                                            |    |
| 49 |                     |                     |                                                            |    |
| 50 |                     |                     |                                                            |    |
| 51 |                     |                     |                                                            |    |
| 52 | Roles and           | <a href="#">#5d</a> | Composition, roles, and responsibilities of the            | 8  |
| 53 |                     |                     | coordinating centre, steering committee, endpoint          |    |
| 54 | responsibilities:   |                     | adjudication committee, data management team, and          |    |
| 55 |                     |                     |                                                            |    |
| 56 | committees          |                     |                                                            |    |
| 57 |                     |                     |                                                            |    |
| 58 |                     |                     |                                                            |    |
| 59 |                     |                     |                                                            |    |
| 60 |                     |                     |                                                            |    |

1 other individuals or groups overseeing the trial, if  
 2  
 3 applicable (see Item 21a for data monitoring committee)  
 4  
 5

## 6 Introduction

|    |                           |                     |                                                             |
|----|---------------------------|---------------------|-------------------------------------------------------------|
| 7  |                           |                     |                                                             |
| 8  |                           |                     |                                                             |
| 9  | Background and            | <a href="#">#6a</a> | Description of research question and justification for      |
| 10 |                           |                     |                                                             |
| 11 | rationale                 |                     | undertaking the trial, including summary of relevant        |
| 12 |                           |                     | studies (published and unpublished) examining benefits      |
| 13 |                           |                     |                                                             |
| 14 |                           |                     | and harms for each intervention                             |
| 15 |                           |                     |                                                             |
| 16 |                           |                     |                                                             |
| 17 |                           |                     |                                                             |
| 18 |                           |                     |                                                             |
| 19 | Background and            | <a href="#">#6b</a> | Explanation for choice of comparators                       |
| 20 |                           |                     |                                                             |
| 21 | rationale: choice of      |                     |                                                             |
| 22 |                           |                     |                                                             |
| 23 | comparators               |                     |                                                             |
| 24 |                           |                     |                                                             |
| 25 |                           |                     |                                                             |
| 26 | Objectives                | <a href="#">#7</a>  | Specific objectives or hypotheses                           |
| 27 |                           |                     |                                                             |
| 28 |                           |                     |                                                             |
| 29 | Trial design              | <a href="#">#8</a>  | Description of trial design including type of trial (eg,    |
| 30 |                           |                     | parallel group, crossover, factorial, single group),        |
| 31 |                           |                     | allocation ratio, and framework (eg, superiority,           |
| 32 |                           |                     | equivalence, non-inferiority, exploratory)                  |
| 33 |                           |                     |                                                             |
| 34 |                           |                     |                                                             |
| 35 |                           |                     |                                                             |
| 36 |                           |                     |                                                             |
| 37 |                           |                     |                                                             |
| 38 |                           |                     |                                                             |
| 39 | <b>Methods:</b>           |                     |                                                             |
| 40 |                           |                     |                                                             |
| 41 | <b>Participants,</b>      |                     |                                                             |
| 42 |                           |                     |                                                             |
| 43 | <b>interventions, and</b> |                     |                                                             |
| 44 |                           |                     |                                                             |
| 45 | <b>outcomes</b>           |                     |                                                             |
| 46 |                           |                     |                                                             |
| 47 |                           |                     |                                                             |
| 48 |                           |                     |                                                             |
| 49 | Study setting             | <a href="#">#9</a>  | Description of study settings (eg, community clinic,        |
| 50 |                           |                     | academic hospital) and list of countries where data will be |
| 51 |                           |                     | collected. Reference to where list of study sites can be    |
| 52 |                           |                     | obtained                                                    |
| 53 |                           |                     |                                                             |
| 54 |                           |                     |                                                             |
| 55 |                           |                     |                                                             |
| 56 |                           |                     |                                                             |
| 57 |                           |                     |                                                             |
| 58 |                           |                     |                                                             |
| 59 |                           |                     |                                                             |
| 60 |                           |                     |                                                             |

|    |                      |                      |                                                              |    |
|----|----------------------|----------------------|--------------------------------------------------------------|----|
| 1  | Eligibility criteria | <a href="#">#10</a>  | Inclusion and exclusion criteria for participants. If        | 14 |
| 2  |                      |                      |                                                              |    |
| 3  |                      |                      | applicable, eligibility criteria for study centres and       |    |
| 4  |                      |                      | individuals who will perform the interventions (eg,          |    |
| 5  |                      |                      | surgeons, psychotherapists)                                  |    |
| 6  |                      |                      |                                                              |    |
| 7  |                      |                      |                                                              |    |
| 8  |                      |                      |                                                              |    |
| 9  |                      |                      |                                                              |    |
| 10 |                      |                      |                                                              |    |
| 11 | Interventions:       | <a href="#">#11a</a> | Interventions for each group with sufficient detail to allow | 6  |
| 12 |                      |                      |                                                              |    |
| 13 | description          |                      | replication, including how and when they will be             |    |
| 14 |                      |                      | administered                                                 |    |
| 15 |                      |                      |                                                              |    |
| 16 |                      |                      |                                                              |    |
| 17 |                      |                      |                                                              |    |
| 18 |                      |                      |                                                              |    |
| 19 | Interventions:       | <a href="#">#11b</a> | Criteria for discontinuing or modifying allocated            | 6  |
| 20 |                      |                      |                                                              |    |
| 21 | modifications        |                      | interventions for a given trial participant (eg, drug dose   |    |
| 22 |                      |                      | change in response to harms, participant request, or         |    |
| 23 |                      |                      | improving / worsening disease)                               |    |
| 24 |                      |                      |                                                              |    |
| 25 |                      |                      |                                                              |    |
| 26 |                      |                      |                                                              |    |
| 27 |                      |                      |                                                              |    |
| 28 |                      |                      |                                                              |    |
| 29 | Interventions:       | <a href="#">#11c</a> | Strategies to improve adherence to intervention protocols,   | 6  |
| 30 |                      |                      |                                                              |    |
| 31 | adherence            |                      | and any procedures for monitoring adherence (eg, drug        |    |
| 32 |                      |                      | tablet return; laboratory tests)                             |    |
| 33 |                      |                      |                                                              |    |
| 34 |                      |                      |                                                              |    |
| 35 |                      |                      |                                                              |    |
| 36 | Interventions:       | <a href="#">#11d</a> | Relevant concomitant care and interventions that are         | 6  |
| 37 |                      |                      |                                                              |    |
| 38 | concomitant care     |                      | permitted or prohibited during the trial                     |    |
| 39 |                      |                      |                                                              |    |
| 40 |                      |                      |                                                              |    |
| 41 |                      |                      |                                                              |    |
| 42 | Outcomes             | <a href="#">#12</a>  | Primary, secondary, and other outcomes, including the        | 7  |
| 43 |                      |                      |                                                              |    |
| 44 |                      |                      | specific measurement variable (eg, systolic blood            |    |
| 45 |                      |                      | pressure), analysis metric (eg, change from baseline, final  |    |
| 46 |                      |                      | value, time to event), method of aggregation (eg, median,    |    |
| 47 |                      |                      | proportion), and time point for each outcome. Explanation    |    |
| 48 |                      |                      | of the clinical relevance of chosen efficacy and harm        |    |
| 49 |                      |                      | outcomes is strongly recommended                             |    |
| 50 |                      |                      |                                                              |    |
| 51 |                      |                      |                                                              |    |
| 52 |                      |                      |                                                              |    |
| 53 |                      |                      |                                                              |    |
| 54 |                      |                      |                                                              |    |
| 55 |                      |                      |                                                              |    |
| 56 |                      |                      |                                                              |    |
| 57 |                      |                      |                                                              |    |
| 58 |                      |                      |                                                              |    |
| 59 |                      |                      |                                                              |    |
| 60 |                      |                      |                                                              |    |

|    |                           |                      |                                                            |    |
|----|---------------------------|----------------------|------------------------------------------------------------|----|
| 1  | Participant timeline      | <a href="#">#13</a>  | Time schedule of enrolment, interventions (including any   | 13 |
| 2  |                           |                      | run-ins and washouts), assessments, and visits for         |    |
| 3  |                           |                      | participants. A schematic diagram is highly recommended    |    |
| 4  |                           |                      | (see Figure)                                               |    |
| 5  |                           |                      |                                                            |    |
| 6  |                           |                      |                                                            |    |
| 7  |                           |                      |                                                            |    |
| 8  |                           |                      |                                                            |    |
| 9  |                           |                      |                                                            |    |
| 10 |                           |                      |                                                            |    |
| 11 | Sample size               | <a href="#">#14</a>  | Estimated number of participants needed to achieve         | 7  |
| 12 |                           |                      | study objectives and how it was determined, including      |    |
| 13 |                           |                      | clinical and statistical assumptions supporting any sample |    |
| 14 |                           |                      | size calculations                                          |    |
| 15 |                           |                      |                                                            |    |
| 16 |                           |                      |                                                            |    |
| 17 |                           |                      |                                                            |    |
| 18 |                           |                      |                                                            |    |
| 19 |                           |                      |                                                            |    |
| 20 |                           |                      |                                                            |    |
| 21 | Recruitment               | <a href="#">#15</a>  | Strategies for achieving adequate participant enrolment to | 7  |
| 22 |                           |                      | reach target sample size                                   |    |
| 23 |                           |                      |                                                            |    |
| 24 |                           |                      |                                                            |    |
| 25 |                           |                      |                                                            |    |
| 26 | <b>Methods:</b>           |                      |                                                            |    |
| 27 |                           |                      |                                                            |    |
| 28 | <b>Assignment of</b>      |                      |                                                            |    |
| 29 | <b>interventions (for</b> |                      |                                                            |    |
| 30 | <b>controlled trials)</b> |                      |                                                            |    |
| 31 |                           |                      |                                                            |    |
| 32 |                           |                      |                                                            |    |
| 33 |                           |                      |                                                            |    |
| 34 |                           |                      |                                                            |    |
| 35 |                           |                      |                                                            |    |
| 36 | Allocation: sequence      | <a href="#">#16a</a> | Method of generating the allocation sequence (eg,          | 5  |
| 37 | generation                |                      | computer-generated random numbers), and list of any        |    |
| 38 |                           |                      | factors for stratification. To reduce predictability of a  |    |
| 39 |                           |                      | random sequence, details of any planned restriction (eg,   |    |
| 40 |                           |                      | blocking) should be provided in a separate document that   |    |
| 41 |                           |                      | is unavailable to those who enrol participants or assign   |    |
| 42 |                           |                      | interventions                                              |    |
| 43 |                           |                      |                                                            |    |
| 44 |                           |                      |                                                            |    |
| 45 |                           |                      |                                                            |    |
| 46 |                           |                      |                                                            |    |
| 47 |                           |                      |                                                            |    |
| 48 |                           |                      |                                                            |    |
| 49 |                           |                      |                                                            |    |
| 50 |                           |                      |                                                            |    |
| 51 |                           |                      |                                                            |    |
| 52 |                           |                      |                                                            |    |
| 53 | Allocation                | <a href="#">#16b</a> | Mechanism of implementing the allocation sequence (eg,     | 5  |
| 54 | concealment               |                      | central telephone; sequentially numbered, opaque,          |    |
| 55 |                           |                      |                                                            |    |
| 56 |                           |                      |                                                            |    |
| 57 |                           |                      |                                                            |    |
| 58 | mechanism                 |                      |                                                            |    |
| 59 |                           |                      |                                                            |    |
| 60 |                           |                      |                                                            |    |



sealed envelopes), describing any steps to conceal the sequence until interventions are assigned

Allocation: [#16c](#) Who will generate the allocation sequence, who will enrol participants, and who will assign participants to interventions 5

Blinding (masking) [#17a](#) Who will be blinded after assignment to interventions (eg, trial participants, care providers, outcome assessors, data analysts), and how 5

Blinding (masking): [#17b](#) If blinded, circumstances under which unblinding is permissible, and procedure for revealing a participant's allocated intervention during the trial 5

**Methods: Data collection, management, and analysis**

Data collection plan [#18a](#) Plans for assessment and collection of outcome, baseline, and other trial data, including any related processes to promote data quality (eg, duplicate measurements, training of assessors) and a description of study instruments (eg, questionnaires, laboratory tests) along with their reliability and validity, if known. Reference to where data collection forms can be found, if not in the protocol 6

|    |                            |                      |                                                                |   |
|----|----------------------------|----------------------|----------------------------------------------------------------|---|
| 1  | Data collection plan:      | <a href="#">#18b</a> | Plans to promote participant retention and complete            | 6 |
| 2  |                            |                      |                                                                |   |
| 3  | retention                  |                      | follow-up, including list of any outcome data to be            |   |
| 4  |                            |                      | collected for participants who discontinue or deviate from     |   |
| 5  |                            |                      | intervention protocols                                         |   |
| 6  |                            |                      |                                                                |   |
| 7  |                            |                      |                                                                |   |
| 8  |                            |                      |                                                                |   |
| 9  |                            |                      |                                                                |   |
| 10 |                            |                      |                                                                |   |
| 11 | Data management            | <a href="#">#19</a>  | Plans for data entry, coding, security, and storage,           | 8 |
| 12 |                            |                      | including any related processes to promote data quality        |   |
| 13 |                            |                      | (eg, double data entry; range checks for data values).         |   |
| 14 |                            |                      | Reference to where details of data management                  |   |
| 15 |                            |                      | procedures can be found, if not in the protocol                |   |
| 16 |                            |                      |                                                                |   |
| 17 |                            |                      |                                                                |   |
| 18 | Statistics: outcomes       | <a href="#">#20a</a> | Statistical methods for analysing primary and secondary        | 7 |
| 19 |                            |                      | outcomes. Reference to where other details of the              |   |
| 20 |                            |                      | statistical analysis plan can be found, if not in the protocol |   |
| 21 |                            |                      |                                                                |   |
| 22 |                            |                      |                                                                |   |
| 23 | Statistics: additional     | <a href="#">#20b</a> | Methods for any additional analyses (eg, subgroup and          | 7 |
| 24 | analyses                   |                      | adjusted analyses)                                             |   |
| 25 |                            |                      |                                                                |   |
| 26 |                            |                      |                                                                |   |
| 27 |                            |                      |                                                                |   |
| 28 | Statistics: analysis       | <a href="#">#20c</a> | Definition of analysis population relating to protocol non-    | 7 |
| 29 | population and             |                      | adherence (eg, as randomised analysis), and any                |   |
| 30 | missing data               |                      | statistical methods to handle missing data (eg, multiple       |   |
| 31 |                            |                      | imputation)                                                    |   |
| 32 |                            |                      |                                                                |   |
| 33 |                            |                      |                                                                |   |
| 34 |                            |                      |                                                                |   |
| 35 |                            |                      |                                                                |   |
| 36 | <b>Methods: Monitoring</b> |                      |                                                                |   |
| 37 |                            |                      |                                                                |   |
| 38 |                            |                      |                                                                |   |
| 39 | Data monitoring:           | <a href="#">#21a</a> | Composition of data monitoring committee (DMC);                | 8 |
| 40 | formal committee           |                      | summary of its role and reporting structure; statement of      |   |
| 41 |                            |                      | whether it is independent from the sponsor and                 |   |
| 42 |                            |                      | competing interests; and reference to where further            |   |
| 43 |                            |                      |                                                                |   |
| 44 |                            |                      |                                                                |   |
| 45 |                            |                      |                                                                |   |
| 46 |                            |                      |                                                                |   |
| 47 |                            |                      |                                                                |   |
| 48 |                            |                      |                                                                |   |
| 49 |                            |                      |                                                                |   |
| 50 |                            |                      |                                                                |   |
| 51 |                            |                      |                                                                |   |
| 52 |                            |                      |                                                                |   |
| 53 |                            |                      |                                                                |   |
| 54 |                            |                      |                                                                |   |
| 55 |                            |                      |                                                                |   |
| 56 |                            |                      |                                                                |   |
| 57 |                            |                      |                                                                |   |
| 58 |                            |                      |                                                                |   |
| 59 |                            |                      |                                                                |   |
| 60 |                            |                      |                                                                |   |

1 details about its charter can be found, if not in the  
 2  
 3 protocol. Alternatively, an explanation of why a DMC is  
 4  
 5 not needed  
 6  
 7

|    |                      |                      |                                                              |   |
|----|----------------------|----------------------|--------------------------------------------------------------|---|
| 8  | Data monitoring:     | <a href="#">#21b</a> | Description of any interim analyses and stopping             | 8 |
| 9  |                      |                      |                                                              |   |
| 10 | interim analysis     |                      | guidelines, including who will have access to these          |   |
| 11 |                      |                      |                                                              |   |
| 12 |                      |                      | interim results and make the final decision to terminate     |   |
| 13 |                      |                      |                                                              |   |
| 14 |                      |                      | the trial                                                    |   |
| 15 |                      |                      |                                                              |   |
| 16 |                      |                      |                                                              |   |
| 17 |                      |                      |                                                              |   |
| 18 | Harms                | <a href="#">#22</a>  | Plans for collecting, assessing, reporting, and managing     | 8 |
| 19 |                      |                      |                                                              |   |
| 20 |                      |                      | solicited and spontaneously reported adverse events and      |   |
| 21 |                      |                      |                                                              |   |
| 22 |                      |                      | other unintended effects of trial interventions or trial     |   |
| 23 |                      |                      |                                                              |   |
| 24 |                      |                      | conduct                                                      |   |
| 25 |                      |                      |                                                              |   |
| 26 |                      |                      |                                                              |   |
| 27 |                      |                      |                                                              |   |
| 28 | Auditing             | <a href="#">#23</a>  | Frequency and procedures for auditing trial conduct, if      | 8 |
| 29 |                      |                      |                                                              |   |
| 30 |                      |                      | any, and whether the process will be independent from        |   |
| 31 |                      |                      |                                                              |   |
| 32 |                      |                      | investigators and the sponsor                                |   |
| 33 |                      |                      |                                                              |   |
| 34 |                      |                      |                                                              |   |
| 35 | <b>Ethics and</b>    |                      |                                                              |   |
| 36 |                      |                      |                                                              |   |
| 37 | <b>dissemination</b> |                      |                                                              |   |
| 38 |                      |                      |                                                              |   |
| 39 |                      |                      |                                                              |   |
| 40 |                      |                      |                                                              |   |
| 41 | Research ethics      | <a href="#">#24</a>  | Plans for seeking research ethics committee / institutional  | 8 |
| 42 |                      |                      |                                                              |   |
| 43 | approval             |                      | review board (REC / IRB) approval                            |   |
| 44 |                      |                      |                                                              |   |
| 45 |                      |                      |                                                              |   |
| 46 | Protocol             | <a href="#">#25</a>  | Plans for communicating important protocol modifications     | 8 |
| 47 |                      |                      |                                                              |   |
| 48 | amendments           |                      | (eg, changes to eligibility criteria, outcomes, analyses) to |   |
| 49 |                      |                      |                                                              |   |
| 50 |                      |                      | relevant parties (eg, investigators, REC / IRBs, trial       |   |
| 51 |                      |                      |                                                              |   |
| 52 |                      |                      | participants, trial registries, journals, regulators)        |   |
| 53 |                      |                      |                                                              |   |
| 54 |                      |                      |                                                              |   |
| 55 |                      |                      |                                                              |   |
| 56 |                      |                      |                                                              |   |
| 57 |                      |                      |                                                              |   |
| 58 |                      |                      |                                                              |   |
| 59 |                      |                      |                                                              |   |
| 60 |                      |                      |                                                              |   |

|    |                       |                      |                                                                |    |
|----|-----------------------|----------------------|----------------------------------------------------------------|----|
| 1  | Consent or assent     | <a href="#">#26a</a> | Who will obtain informed consent or assent from potential      | 8  |
| 2  |                       |                      | trial participants or authorised surrogates, and how (see      |    |
| 3  |                       |                      | Item 32)                                                       |    |
| 4  |                       |                      |                                                                |    |
| 5  |                       |                      |                                                                |    |
| 6  |                       |                      |                                                                |    |
| 7  |                       |                      |                                                                |    |
| 8  |                       |                      |                                                                |    |
| 9  | Consent or assent:    | <a href="#">#26b</a> | Additional consent provisions for collection and use of        | 8  |
| 10 | ancillary studies     |                      | participant data and biological specimens in ancillary         |    |
| 11 |                       |                      | studies, if applicable                                         |    |
| 12 |                       |                      |                                                                |    |
| 13 |                       |                      |                                                                |    |
| 14 |                       |                      |                                                                |    |
| 15 |                       |                      |                                                                |    |
| 16 | Confidentiality       | <a href="#">#27</a>  | How personal information about potential and enrolled          | 8  |
| 17 |                       |                      | participants will be collected, shared, and maintained in      |    |
| 18 |                       |                      | order to protect confidentiality before, during, and after     |    |
| 19 |                       |                      | the trial                                                      |    |
| 20 |                       |                      |                                                                |    |
| 21 |                       |                      |                                                                |    |
| 22 |                       |                      |                                                                |    |
| 23 |                       |                      |                                                                |    |
| 24 |                       |                      |                                                                |    |
| 25 |                       |                      |                                                                |    |
| 26 | Declaration of        | <a href="#">#28</a>  | Financial and other competing interests for principal          | 10 |
| 27 | interests             |                      | investigators for the overall trial and each study site        |    |
| 28 |                       |                      |                                                                |    |
| 29 |                       |                      |                                                                |    |
| 30 |                       |                      |                                                                |    |
| 31 | Data access           | <a href="#">#29</a>  | Statement of who will have access to the final trial           | 8  |
| 32 |                       |                      | dataset, and disclosure of contractual agreements that         |    |
| 33 |                       |                      | limit such access for investigators                            |    |
| 34 |                       |                      |                                                                |    |
| 35 |                       |                      |                                                                |    |
| 36 |                       |                      |                                                                |    |
| 37 |                       |                      |                                                                |    |
| 38 |                       |                      |                                                                |    |
| 39 | Ancillary and post    | <a href="#">#30</a>  | Provisions, if any, for ancillary and post-trial care, and for | 8  |
| 40 | trial care            |                      | compensation to those who suffer harm from trial               |    |
| 41 |                       |                      | participation                                                  |    |
| 42 |                       |                      |                                                                |    |
| 43 |                       |                      |                                                                |    |
| 44 |                       |                      |                                                                |    |
| 45 |                       |                      |                                                                |    |
| 46 |                       |                      |                                                                |    |
| 47 | Dissemination policy: | <a href="#">#31a</a> | Plans for investigators and sponsor to communicate trial       | 8  |
| 48 | trial results         |                      | results to participants, healthcare professionals, the         |    |
| 49 |                       |                      | public, and other relevant groups (eg, via publication,        |    |
| 50 |                       |                      | reporting in results databases, or other data sharing          |    |
| 51 |                       |                      | arrangements), including any publication restrictions          |    |
| 52 |                       |                      |                                                                |    |
| 53 |                       |                      |                                                                |    |
| 54 |                       |                      |                                                                |    |
| 55 |                       |                      |                                                                |    |
| 56 |                       |                      |                                                                |    |
| 57 |                       |                      |                                                                |    |
| 58 |                       |                      |                                                                |    |
| 59 |                       |                      |                                                                |    |
| 60 |                       |                      |                                                                |    |

1 Dissemination policy: [#31b](#) Authorship eligibility guidelines and any intended use of 8  
 2  
 3 authorship professional writers  
 4  
 5

6 Dissemination policy: [#31c](#) Plans, if any, for granting public access to the full 8  
 7  
 8 reproducible protocol, participant-level dataset, and statistical code  
 9  
 10 research  
 11  
 12

## 13 Appendices

14  
 15  
 16  
 17 Informed consent [#32](#) Model consent form and other related documentation n/a  
 18  
 19 materials given to participants and authorised surrogates  
 20  
 21

22  
 23 Biological specimens [#33](#) Plans for collection, laboratory evaluation, and storage of n/a  
 24  
 25 biological specimens for genetic or molecular analysis in  
 26  
 27 the current trial and for future use in ancillary studies, if  
 28  
 29 applicable  
 30  
 31

32  
 33 The SPIRIT Explanation and Elaboration paper is distributed under the terms of the Creative  
 34  
 35 Commons Attribution License CC-BY-NC. This checklist was completed on 08. June 2021 using  
 36  
 37 <https://www.goodreports.org/>, a tool made by the [EQUATOR Network](#) in collaboration with  
 38  
 39 [Penelope.ai](#)  
 40  
 41  
 42  
 43  
 44  
 45  
 46  
 47  
 48  
 49  
 50  
 51  
 52  
 53  
 54  
 55  
 56  
 57  
 58  
 59  
 60

# BMJ Open

## Statin and dual antiplatelet therapy for the prevention of early neurological deterioration and recurrent stroke in branch atheromatous disease (SATBRAD) : protocol for a prospective single-arm study using a historical control for comparison

|                                 |                                                                                                                                                                                                                                                                                                                                                                                                                                                                                                                                                                                                                                     |
|---------------------------------|-------------------------------------------------------------------------------------------------------------------------------------------------------------------------------------------------------------------------------------------------------------------------------------------------------------------------------------------------------------------------------------------------------------------------------------------------------------------------------------------------------------------------------------------------------------------------------------------------------------------------------------|
| Journal:                        | <i>BMJ Open</i>                                                                                                                                                                                                                                                                                                                                                                                                                                                                                                                                                                                                                     |
| Manuscript ID                   | bmjopen-2021-054381.R1                                                                                                                                                                                                                                                                                                                                                                                                                                                                                                                                                                                                              |
| Article Type:                   | Protocol                                                                                                                                                                                                                                                                                                                                                                                                                                                                                                                                                                                                                            |
| Date Submitted by the Author:   | 23-Oct-2021                                                                                                                                                                                                                                                                                                                                                                                                                                                                                                                                                                                                                         |
| Complete List of Authors:       | Huang, Yen-Chu; Chang Gung Memorial Hospital Chiayi Branch, Neurology; Chang Gung University<br>Lee, Jiann-Der; Chang Gung Memorial Hospital Chiayi Branch, Neurology; Chang Gung Memorial Hospital Chiayi Branch<br>Weng, Hsu-Huei; Chang Gung Memorial Hospital Chiayi Branch, Diagnostic Radiology<br>Lin, Leng-Chieh; Chang Gung Memorial Hospital Chiayi Branch, Department of Emergency Medicine<br>Tsai, Yuan-Hsiung; Chang Gung Memorial Hospital Chiayi Branch, Radiology; Chang Gung University,<br>Yang, Jen-Tsung; Chang Gung Memorial Hospital Chiayi Branch, Neurosurgery; Chang Gung Memorial Hospital Chiayi Branch |
| <b>Primary Subject Heading</b>: | Neurology                                                                                                                                                                                                                                                                                                                                                                                                                                                                                                                                                                                                                           |
| Secondary Subject Heading:      | Medical management, Radiology and imaging                                                                                                                                                                                                                                                                                                                                                                                                                                                                                                                                                                                           |
| Keywords:                       | STROKE MEDICINE, VASCULAR MEDICINE, Magnetic resonance imaging < RADIOTHERAPY, Neuroradiology < NEUROLOGY, Stroke < NEUROLOGY                                                                                                                                                                                                                                                                                                                                                                                                                                                                                                       |
|                                 |                                                                                                                                                                                                                                                                                                                                                                                                                                                                                                                                                                                                                                     |

SCHOLARONE™  
Manuscripts

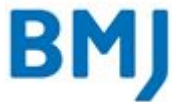

I, the Submitting Author has the right to grant and does grant on behalf of all authors of the Work (as defined in the below author licence), an exclusive licence and/or a non-exclusive licence for contributions from authors who are: i) UK Crown employees; ii) where BMJ has agreed a CC-BY licence shall apply, and/or iii) in accordance with the terms applicable for US Federal Government officers or employees acting as part of their official duties; on a worldwide, perpetual, irrevocable, royalty-free basis to BMJ Publishing Group Ltd ("BMJ") its licensees and where the relevant Journal is co-owned by BMJ to the co-owners of the Journal, to publish the Work in this journal and any other BMJ products and to exploit all rights, as set out in our [licence](#).

The Submitting Author accepts and understands that any supply made under these terms is made by BMJ to the Submitting Author unless you are acting as an employee on behalf of your employer or a postgraduate student of an affiliated institution which is paying any applicable article publishing charge ("APC") for Open Access articles. Where the Submitting Author wishes to make the Work available on an Open Access basis (and intends to pay the relevant APC), the terms of reuse of such Open Access shall be governed by a Creative Commons licence – details of these licences and which [Creative Commons](#) licence will apply to this Work are set out in our licence referred to above.

Other than as permitted in any relevant BMJ Author's Self Archiving Policies, I confirm this Work has not been accepted for publication elsewhere, is not being considered for publication elsewhere and does not duplicate material already published. I confirm all authors consent to publication of this Work and authorise the granting of this licence.

1  
2  
3  
4 1 **Statin and dual antiplatelet therapy for the prevention of early neurological**  
5  
6 2 **deterioration and recurrent stroke in branch atheromatous disease (SATBRAD) :**  
7  
8 3 **protocol for a prospective single-arm study using a historical control for**  
9  
10 4 **comparison**

11  
12  
13 5  
14  
15 6 Yen-Chu Huang<sup>1</sup>, MD; Jiann-Der Lee<sup>1</sup>, MD; Hsu-Huei Weng<sup>2</sup>, MD, MPH, PhD; Leng-Chieh Lin<sup>4</sup>,  
16  
17 7 MD; Yuan-Hsiung Tsai<sup>2</sup>, MD, PhD; Jen-Tsung Yang<sup>3\*</sup>, MD, PhD.  
18  
19  
20 8

21  
22 9 <sup>1</sup>Department of Neurology, <sup>2</sup>Department of Diagnostic Radiology, <sup>3</sup>Department of Neurosurgery and  
23  
24 10 Department of Emergency Medicine<sup>4</sup>, Chang Gung Memorial Hospital at Chiayi, Chang-Gung  
25  
26 11 University College of Medicine, Taiwan  
27  
28 12  
29  
30 13

31 14 Word count: 3537  
32  
33 15  
34  
35 16  
36  
37 17  
38 18  
39  
40 19  
41  
42 20  
43  
44 21  
45 22  
46  
47 23  
48  
49 24

50 25 \* **Corresponding author:** Jen-Tsung Yang  
51

52 26 Department of Neurology, Chang Gung Memorial Hospital  
53

54  
55 27 No. 6 West Chia-Pu Road, Putz City, Chiayi County, Taiwan  
56

57 28 E-mail: [jents716@ms32.hinet.net](mailto:jents716@ms32.hinet.net)  
58

59 29 Phone: +886 5 3621000 ext. 2759 Fax: +886 5 3623002  
60



## 1 2 3 4 1 **Abstract**

### 5 6 2 **Introduction:**

7  
8 3 Branch atheromatous disease (BAD) contributes to small-vessel occlusion in cases of occlusion  
9  
10 4 or stenosis of large caliber penetrating arteries, and it is associated with a higher possibility of early  
11  
12 5 neurological deterioration (END) and recurrent stroke in acute ischemic stroke. As the pathology of  
13  
14 6 BAD is due to atherosclerosis, we postulate that early intensive medical treatment with dual antiplatelet  
15  
16 7 therapy (DAPT) and high-intensity statins, may prevent END and recurrent stroke in acute small  
17  
18 8 subcortical infarction caused by BAD.  
19

### 20 21 22 9 **Methods and analysis:**

23  
24 10 In this prospective, single-center, open-label, non-randomized, single-arm study using a historical  
25  
26 11 control, we will compare early DAPT and high-intensity statin treatment with a historical control group  
27  
28 12 of BAD patients who were treated with single antiplatelet therapy without high-intensity statin  
29  
30 13 treatment. Patients will be eligible for enrollment if they are admitted for acute ischemic stroke within  
31  
32 14 24h, have a National Institutes of Health Stroke Scale (NIHSS) score of 1-8 and are diagnosed with  
33  
34 15 BAD by MRI. Patients will take aspirin, clopidogrel and high-intensity statins (atorvastatin or  
35  
36 16 rosuvastatin) within 24h of stroke onset, followed by aspirin or clopidogrel alone from day 22. The  
37  
38 17 primary endpoint is the percentage of patients who develop END within 7 days of stroke onset (defined  
39  
40 18 as an increase in the NIHSS score  $\geq 2$  points) and recurrent stroke within 30 days. The total sample  
41  
42 19 sizes will be 138 for the intervention group and 277 for the control group. A historical control group  
43  
44 20 will be drawn from previous prospective observation studies.  
45  
46

### 47 48 49 21 **Ethics and dissemination:**

50  
51 22 The protocol of this study has been approved by the Institutional Review Board of Chang Gung  
52  
53 23 Memorial Hospital (202001386A3). All participants will have to sign and date an informed consent  
54  
55 24 form. The findings arising from this study will be disseminated in peer-reviewed journals and academic  
56  
57 25 conferences.  
58  
59  
60 26

1  
2  
3  
4 1 *Trial registration number:* ClinicalTrials.gov Identifier: NCT04824911

5  
6 2

7  
8 3 Keywords: Statin, antiplatelet therapy, early neurological deterioration, recurrent stroke, branch  
9  
10 4 atheromatous disease

11  
12  
13 5

## 14 15 6 **Strengths and limitations of this study**

- 16  
17 7 1. This will be the first trial to evaluate the effectiveness of dual antiplatelet therapy and high-  
18  
19 8 intensity statins for the prevention of early neurological deterioration and recurrent stroke in  
20  
21 9 patients with acute ischemic stroke from branch atheromatous disease.  
22  
23  
24 10 2. This trial will recruit patients with National Institutes of Health Stroke Scale scores of 1-8,  
25  
26 11 which are more severe than current guideline suggestion of scores  $\leq 3$  for mild stroke with dual  
27  
28 12 antiplatelet therapy.  
29  
30  
31 13 3. A randomized controlled study with a parallel control arm receiving single antiplatelet treatment  
32  
33 14 for mild stroke is against the latest guidelines so it's inevitable to conduct this trial with a  
34  
35 15 historical control group.  
36  
37 16 4. The use of a historical control group has the inherent drawbacks of nonrandomization and  
38  
39 17 nonblinding so we cannot exclude the possibility of selection, performance, detection and  
40  
41 18 attrition bias.  
42  
43  
44 19 5. Because dual antiplatelet therapy and high-intensity statin treatment are administered  
45  
46 20 simultaneously, it's unable to know each treatment effect.  
47  
48  
49 21  
50  
51 22  
52  
53 23  
54  
55 24  
56  
57  
58 25  
59  
60 26

## 1. Introduction

Small-vessel occlusion is the most common stroke subtype in Asians; it is caused by the occlusion of deep perforating arteries, mainly by the underlying pathologies of lipohyalinosis or cerebral amyloid angiopathy.<sup>1,2</sup> Branch atheromatous disease (BAD) has also been reported to contribute to small-vessel occlusion in cases of occlusion or stenosis that occur at the origin of large caliber penetrating arteries, due to microatheromas or junctional atherosclerotic plaques.<sup>3</sup> BAD is associated with an increased possibility of early neurological deterioration (END) and recurrent stroke, especially progressive motor deficits, compared with infarction due to hypertensive arteriopathy.<sup>4-6</sup> It has been proposed that BAD should be classified as large artery atherosclerosis rather than small vessel occlusion.<sup>7</sup>

Following acute ischemic stroke, single antiplatelet agents, such as aspirin or clopidogrel, are the mainstay treatment for recurrent stroke prevention. However, the modest effects of single antiplatelet therapy led to the study of combination antiplatelet therapy for the prevention of recurrent stroke. The Clopidogrel in High-Risk Patients with Acute Nondisabling Cerebrovascular Events (CHANCE) and the Platelet-Oriented Inhibition in New TIA and Minor Ischemic Stroke (POINT) trials showed that dual antiplatelet therapy (DAPT) might be beneficial for reducing the probability of ischemic events in patients with high-risk transient ischemic attack (TIA) or minor stroke.<sup>8,9</sup> However, these studies included all non-embolic ischemic stroke types. Some studies also showed that DAPT reduced the possibility of END.<sup>10,11</sup> A retrospective observation study showed that DAPT was beneficial for the primary outcomes of stroke recurrence, myocardial infarction, and all-cause death in patients with large atherosclerotic stroke.<sup>12</sup>

For patients with acute ischemic stroke, the guidelines suggest starting or continuing statin treatment as soon as oral medications can be used safely.<sup>13</sup> Current guidelines also recommend high- or moderate-intensity statin therapy, independent of the baseline low-density lipoprotein cholesterol (LDL-C), to reduce the risk of stroke and cardiovascular events for patients with TIA or ischemic stroke of atherosclerotic origin.<sup>14</sup> High-dose statin treatment in the acute phase of ischemic stroke and TIA significantly reduced National Institutes of Health Stroke Scale (NIHSS) scores and improved

1  
2  
3  
4 1 short-term functional outcomes without increasing related adverse events<sup>15</sup>; it also effectively  
5  
6 2 stabilized symptomatic intracranial atherosclerotic plaques as documented by high-resolution MRI.<sup>16</sup>  
7

8 3 DAPT and high-intensity statins are the mainstay treatments for intracranial atherosclerosis  
9  
10 4 (ICAS).<sup>17</sup> As BAD and ICAS share the same pathology as atherosclerosis, we postulate that early  
11  
12 5 intensive medical treatment with DAPT and high-intensity statins may prevent early neurological  
13  
14 6 deterioration and recurrent stroke. This study aims to evaluate whether intensive medical therapy with  
15  
16 7 aspirin, clopidogrel and high-intensity statins, can prevent END and recurrent stroke in acute small  
17  
18 8 subcortical infarction caused by BAD.  
19  
20  
21  
22 9

## 24 10 **2. Methods**

### 26 11 **2.1 Study Design**

28 12 In this prospective, single-center, open-label, non-randomized, single-arm, historically  
29  
30 13 controlled study, we will compare early intensive treatment for BAD initiated within 24h of stroke  
31  
32 14 onset, using dual antiplatelet therapy (aspirin plus clopidogrel) and high-intensity statin treatment,  
33  
34 15 with a historical control group of BAD patients treated with single antiplatelet therapy, without  
35  
36 16 high-intensity statin treatment.<sup>18 19</sup> The study will be conducted in Chang Gung Memorial  
37  
38 17 Hospital at Chiayi, Taiwan from March 2021 to Feb 2023.  
39  
40  
41

### 42 18 **2.2 Study population**

44 19 Patients are eligible to participate if they meet the following inclusion criteria: (1) have a  
45  
46 20 clinical diagnosis of ischemic stroke with an NIHSS score of 1–8 (2) have an ischemic lesion on  
47  
48 21 diffuse-weighted imaging (DWI) located in the striatocapsular territory or brain stem areas, with  
49  
50 22 an axial diameter  $\leq 20$ mm (3) have BAD, defined by a visible ischemic lesion in three or more  
51  
52 23 axial cuts on DWI in the lenticulostriate territory or infarcts that extend from the basal surface of  
53  
54 24 the pons (4) could receive intensive medical treatment within 24h of stroke onset. Patients with  
55  
56 25  $>50\%$  stenosis of the relevant arteries on magnetic resonance angiography (MRA), including  
57  
58 26 intra- or extra-cranial internal carotid artery, middle cerebral artery or basilar artery, will be  
59  
60

1  
2  
3  
4 1 excluded. We will also exclude patients at high risk of cardioembolic stroke, such as those with  
5  
6 2 atrial fibrillation or heart failure. Full details of the inclusion and exclusion criteria are listed in  
7  
8 3 Table 1.  
9

10 4 A historical control group will be drawn from our prospective observation studies, which  
11  
12  
13 5 have been executed between January 2011 and December 2020, and aimed to evaluate and predict  
14  
15 6 END or atrial fibrillation.<sup>18 19</sup> Patients will be selected if they fulfill the following inclusion  
16  
17 7 criteria: took aspirin or clopidogrel alone and did not receive high-intensity statin treatment.  
18  
19 8 Patients in the historical control group will have received statin treatment once their total  
20  
21 cholesterol was  $\geq 160$ mg/dl or their LDL-C was  $\geq 100$ mg/dl. High-intensity statin treatment  
22 9 includes atorvastatin 40–80mg or rosuvastatin 20–40mg daily.<sup>20</sup> All clinical information and  
23  
24 10 outcomes have been prospectively recorded.  
25  
26 11

### 28 12 **2.3 Trial intervention**

29  
30  
31 13 Dual antiplatelet and high-intensity statin treatment will be administered within 24h of stroke  
32  
33 14 onset (Figure 1). Dual antiplatelet treatment includes aspirin (300mg loading and 100mg/day) and  
34  
35 15 clopidogrel (300mg loading and 75mg/day) and high-intensity statins includes atorvastatin 40-  
36  
37 16 80mg/day or rosuvastatin 20mg/day. Patients will take aspirin and clopidogrel for 21 days and  
38  
39 then just take aspirin or clopidogrel alone. High-intensity statins will be maintained for 90 days  
40 17  
41 but a decreased dose is allowed if any side effects occur, including elevated liver functions,  
42 18  
43 elevated creatine-phospho-kinase (CPK) and myalgia or at the judgment of the treating physician.  
44 19  
45 We will follow up with alanine aminotransferase (ALT) and CPK 14 days after treatment and  
46 20  
47 will follow up with ALT, CPK and LDL-C 90 days after treatment. Patients with atherosclerotic  
48 21  
49 plaques in the first MRI will keep high-intensity statin treatment for 6 months.  
50  
51 22

52  
53 23 Neurological deficits will be evaluated by a stroke study nurse using the NIHSS, at the 1<sup>st</sup>,  
54  
55 24 2<sup>nd</sup>, 3<sup>rd</sup>, 7<sup>th</sup> and 90<sup>th</sup> day. As END in lacunar infarction is mainly associated with motor deficits,  
56  
57 END is defined as an NIHSS score increase  $\geq 2$  within 7 days of stroke onset.<sup>21</sup> Clinical outcomes  
58 25  
59 at admission and at 90 days will be evaluated using the modified Rankin Scale (mRS). A good  
60 26

1  
2  
3  
4 1 outcome is defined as an mRS score  $\leq 1$ . Mortality at 3 months and any hemorrhagic complications  
5  
6 2 will also be recorded. All examinations will be performed after obtaining written informed  
7  
8 3 consent from the patients or the appropriate family members.  
9

10 4 Patients with visible atheromatous plaques in the parental artery in the initial MRI will  
11  
12 receive a follow-up MRI 6 months later to see the interval changes in atheromatous plaques.  
13 5  
14

#### 15 6 **2.4 Study Outcomes**

16  
17 7 The primary outcome will be the percentage of patients with early neurological deterioration  
18  
19 within 7 days and recurrent ischemic stroke within 30 days. Secondary outcomes will include: (1)  
20 8 the percentage of patients with favorable functional recovery, defined as an mRS  $\leq 1$  at the 90<sup>th</sup>  
21  
22 9 day, (2) the percentage of patients with new clinical vascular events within 90 days, including  
23  
24 10 ischemic stroke, hemorrhagic stroke, TIA, myocardial infarction and vascular death, (3) changes  
25  
26 11 in atherosclerotic plaques, which will be measured by high-resolution MRI at the start of the study  
27  
28 12 and after 6 months, (4) the number of moderate to severe bleeding events as defined by the  
29  
30 GUSTO classification,<sup>22</sup> and (5) the total mortality rate.  
31 13  
32  
33 14

#### 35 15 **2.5 Sample Size**

36  
37 16 In single subcortical infarction, END was reported to occur frequently in BAD with an incidence  
38  
39 of 27% in our previous cohort and 33.8- 40% in other studies.<sup>10 23</sup> The END rate may decrease to  
40 17  
41 9.7% in patients with BAD who underwent combination antiplatelet therapy with cilostazol.<sup>10</sup>  
42 18  
43 The total sample sizes will be 138 for the intervention group and 277 for the control group. The  
44 19  
45 estimated END rate is 27% for the control group and 15% for the intervention group, with 80%  
46 20  
47 power and a two-sided alpha of 0.05. The intent-to-treat (ITT) principle will be applied to the  
48  
49 21 primary outcome analysis, and the sample size was therefore inflated to safeguard against 5%  
50  
51 22 lost-to-follow-up in the actual treatment groups, which could dilute the effect size.  
52  
53 23  
54

#### 55 24 **2.6 Statistical analysis**

56  
57 25 Statistical analyses will be performed using the Statistical Package for the Social Sciences  
58  
59 (SPSS) statistical software (version 25, Chicago, IL, USA). The Kolmogorov-Smirnov test will  
60 26

1  
2  
3  
4 1 be used to examine the normality of continuous variables. The Mann-Whitney U test and  
5  
6 2 Student's t-test will be used to test for differences between the two groups, as appropriate.  
7  
8 3 Categorical data will be analyzed using the Chi-squared test. A propensity score matching  
9  
10 4 analysis will be used to measure and balance pre-determined covariates between two groups. A  
11  
12 5 logistic regression model will be used to test independent variables for the measured outcomes.  
13  
14 6 Variables showing a p value of <0.1 for univariate analysis will be entered into the multivariate  
15  
16 7 logistic analysis using the forward selection method. All tests will be two-tailed, and a p value  
17  
18 8 <0.05 is considered to indicate a statistically significant difference.  
19  
20

## 21 9 **2.7 Data management**

22  
23  
24 10 All the completed documents and the informed consent forms will be stored in a secured  
25  
26 11 facility, under lock and key. The database for clinical data will be created using Access software  
27  
28 12 and the access will be limited to principal investigators. A study steering committee will be  
29  
30 13 established to ensure that the study conducted to the required standards. The clinical research  
31  
32 14 assistant will verify all consent forms, compliance with study protocol and procedures, and data  
33  
34 15 quality. The research team will make half-yearly reports to the study steering committee. All the  
35  
36 16 records and documents will be kept for 7 years after the completion of the study.  
37  
38  
39

## 40 17 **2.8 Adverse events**

41  
42 18 Any adverse events that occur during the conduct of the study will be reported to the Domain  
43  
44 19 Specific Research Board (DSRB) according to the local institutional policy. Interim analyses will  
45  
46 20 be conducted by the study steering committee to monitor the accumulating data and to decide  
47  
48 21 continuing or stopping the trial.  
49  
50

## 51 22 **2.9 Patient and public involvement:**

52  
53 23 Patients and members from stroke associations participated in the preparation and formulation of  
54  
55 24 this proposal. Patients with acute ischemic stroke from BAD will be involved in the trial. The  
56  
57 25 associations will be involved in plans to disseminate the study results to their members and wider  
58  
59 26 patient communities.

## 2.10 Ethics and dissemination:

The protocol of this study has been approved by the Institutional Review Board of Chang Gung Memorial Hospital (202001386A3). The study is registered on ClinicalTrials.gov (NCT04824911). All participants will have to sign and date an informed consent form. The findings arising from this study will be disseminated in peer-reviewed journals and academic conferences. The datasets during the current study are available from the corresponding author on reasonable request.

## Author contributions

YCH and JTY conceptualized and designed the initial protocol. JDL, LCL, HHW and YHT amended the initial protocol. YCH drafted the manuscript and received the fund. All authors read and approved of the protocol prior to submission.

## Funding

This work was supported by Chang Gung Memorial Hospital research grants (CORPG6K0161).

## Competing interests

None declared.

## Provenance and peer review

Not commissioned; externally peer reviewed.



## References

1. Charidimou A, Pantoni L, Love S. The concept of sporadic cerebral small vessel disease: A road map on key definitions and current concepts. *Int J Stroke* 2016;11:6–18.
2. Kim BJ, Kim JS. Ischemic stroke subtype classification: an asian viewpoint. *J Stroke* 2014;16:8-17.
3. Petrone L, Nannoni S, Del Bene A, et al. Branch Atheromatous Disease: A Clinically Meaningful, Yet Unproven Concept. *Cerebrovasc Dis* 2016;41:87–95.
4. Yamamoto Y, Ohara T, Hamanaka M, et al. Characteristics of intracranial branch atheromatous disease and its association with progressive motor deficits. *J Neurol Sci* 2011;304:78–82.
5. Kim JS, Yoon Y. Single subcortical infarction associated with parental arterial disease: important yet neglected sub-type of atherothrombotic stroke. *Int J Stroke* 2013;8:197–203.
6. Ko Y, Lee S, Chung JW, et al. MRI-based Algorithm for Acute Ischemic Stroke Subtype Classification. *J Stroke* 2014;16:161–72.
7. Gao S, Wang YJ, Xu AD, et al. Chinese ischemic stroke subclassification. *Front Neurol* 2011;2:6.
8. Johnston SC, Easton JD, Farrant M, et al. Clopidogrel and Aspirin in Acute Ischemic Stroke and High-Risk TIA. *N Engl J Med* 2018;379:215–25.
9. Wang Y, Wang Y, Zhao X, et al. Clopidogrel with aspirin in acute minor stroke or transient ischemic attack. *N Engl J Med* 2013;369:11–9.
10. Kimura T, Tucker A, Sugimura T, et al. Ultra-Early Combination Antiplatelet Therapy with Cilostazol for the Prevention of Branch Atheromatous Disease: A Multicenter Prospective Study. *Cerebrovasc Dis Extra* 2016;6:84–95.
11. Wang C, Yi X, Zhang B, et al. Clopidogrel plus aspirin prevents early neurologic deterioration and improves 6-month outcome in patients with acute large artery atherosclerosis stroke. *Clin Appl Thromb Hemost* 2015;21:453–61.
12. Kim D, Park JM, Kang K, et al. Dual Versus Mono Antiplatelet Therapy in Large Atherosclerotic Stroke. *Stroke* 2019;50:1184–92.
13. Grundy SM, Stone NJ, Bailey AL, et al. 2018 AHA/ACC/AACVPR/AAPA/ABC/ACPM/ADA/AGS/APHA/ASPC/NLA/PCNA Guideline on the Management of Blood Cholesterol: A Report of the American College of Cardiology/American Heart Association Task Force on Clinical Practice Guidelines. *Circulation* 2019;139:e1082–e143.
14. Stone NJ, Robinson JG, Lichtenstein AH, et al. 2013 ACC/AHA guideline on the treatment of blood cholesterol to reduce atherosclerotic cardiovascular risk in adults: a report of the American College of Cardiology/American Heart Association Task Force on Practice Guidelines. *Circulation* 2014;129:S1–45.
15. Fang JX, Wang EQ, Wang W, et al. The efficacy and safety of high-dose statins in acute phase of ischemic stroke and transient ischemic attack: a systematic review. *Intern Emerg Med* 2017;12:679–87.
16. Chung JW, Cha J, Lee MJ, et al. Intensive Statin Treatment in Acute Ischaemic Stroke Patients

- 1  
2  
3 1 with Intracranial Atherosclerosis: a High-Resolution Magnetic Resonance Imaging study  
4 2 (STAMINA-MRI Study). *J Neurol Neurosurg Psychiatry* 2020;91:204–11.  
5  
6 3 17. Liu D, Liu J, Cai Y, et al. Is the future of symptomatic intracranial atherosclerotic stenosis  
7 4 management promising? *J Neurol Neurosurg Psychiatry* 2020;91:122–24.  
8  
9 5 18. Huang WY, Lee M, Sung SF, et al. Atrial fibrillation trial to evaluate real-world procedures for  
10 6 their utility in helping to lower stroke events: A randomized clinical trial. *Int J Stroke*  
11 7 2021;16:300–10.  
12  
13 8 19. Huang YC, Tsai YH, Lee JD, et al. A Novel Neuroimaging Model to Predict Early Neurological  
14 9 Deterioration After Acute Ischemic Stroke. *Curr Neurovasc Res* 2018;15:129–37.  
15  
16 10 20. Collins R, Reith C, Emberson J, et al. Interpretation of the evidence for the efficacy and safety of  
17 11 statin therapy. *Lancet* 2016;388:2532–61.  
18  
19 12 21. Siegler JE, Martin-Schild S. Early Neurological Deterioration (END) after stroke: the END depends  
20 13 on the definition. *Int J Stroke* 2011;6:211–2.  
21  
22 14 22. Mehran R, Rao SV, Bhatt DL, et al. Standardized bleeding definitions for cardiovascular clinical  
23 15 trials: a consensus report from the Bleeding Academic Research Consortium. *Circulation*  
24 16 2011;123:2736–47.  
25  
26 17 23. van Rooij WJ, Sprengers ME, de Gast AN, et al. 3D rotational angiography: the new gold  
27 18 standard in the detection of additional intracranial aneurysms. *AJNR Am J Neuroradiol*  
28 19 2008;29:976–9.  
29  
30  
31  
32  
33  
34  
35  
36  
37  
38  
39  
40  
41  
42  
43  
44  
45  
46  
47  
48  
49  
50  
51  
52  
53  
54  
55  
56  
57  
58  
59  
60

1  
2  
3  
4  
5  
6  
7  
8  
9  
10  
11  
12  
13  
14  
15  
16  
17  
18  
19  
20  
21  
22  
23  
24  
25  
26  
27  
28  
29  
30  
31  
32  
33  
34  
35  
36  
37  
38  
39  
40  
41  
42  
43  
44  
45  
46  
47  
48  
49  
50  
51  
52  
53  
54  
55  
56  
57  
58  
59  
60

1 **Figure 1.** A schematic diagram of the treatment schedule and study design.

2 In the intervention group, patients will take aspirin (300mg loading and 100mg/day), clopidogrel  
3 (300mg loading and 75mg/day) and high-intensity statins (atorvastatin 40-80mg/day or rosuvastatin  
4 20mg/day) within 24h of stroke onset, followed by aspirin or clopidogrel alone from day 22. High-  
5 intensity statins includes atorvastatin 40-80mg/day or rosuvastatin 20mg/day. In the historical control  
6 group, patients will be selected from previous prospective studies if they fulfill the following inclusion  
7 criteria: took aspirin or clopidogrel alone and did not receive high-intensity statin treatment.

For peer review only

1  
2  
3  
4 **Table 1.** Inclusion and exclusion criteria (Issue date: 01 Sep 2020)  
5  
6

7 **Inclusion Criteria**

- 8  
9  
10  
11  
12  
13  
14  
15  
16  
17  
18  
19  
20  
21  
22  
23  
24  
25  
26  
27
- Clinical diagnosis of ischemic stroke with a National Institute of Health Stroke Scale (NIHSS) score of 1–8
  - An ischemic lesion on diffuse-weighted imaging located in the striatocapsular territory or brain stem areas, with an axial diameter  $\leq 20$ mm.
  - Branch atheromatous disease, defined by a visible ischemic lesion in three or more axial cuts on DWI in the lenticulostriate territory or infarcts that extend from the basal surface of the pons
  - Ability to participate within 24h of the time of last known free of new ischemic symptoms.
  - Head MRI ruling out hemorrhage or other pathologies, such as vascular malformation, tumor, or abscess, that could explain their symptoms or contraindicate therapy.
  - Ability to tolerate high intensity medical therapy, including aspirin at a dose of 50–325mg/day, clopidogrel at 300mg loading and 75mg after day 2 and high-intensity statins (either atorvastatin 40-80mg or rosuvastatin 20mg/day).
  - Pre-stroke mRS  $\leq 1$

28 **Exclusion Criteria**

- 29  
30  
31  
32  
33  
34  
35  
36  
37  
38  
39  
40  
41  
42  
43  
44  
45  
46  
47  
48  
49  
50  
51  
52  
53  
54  
55  
56  
57  
58  
59  
60
- Age <18 years.
  - At the judgment of the treating physician
  - A candidate for thrombolysis, endarterectomy or endovascular intervention.
  - Receipt of any intravenous or intra-arterial thrombolysis within 1 week prior to the index event.
  - Patients with >50% stenosis of the relevant arteries as determined by magnetic resonance angiography (MRA), including the intra- or extra-cranial internal carotid artery, middle cerebral artery or basilar artery.
  - Patients with a high risk of cardioembolic stroke, such as those with atrial fibrillation, acute myocardial infarction, severe heart failure or valvular heart disease.
  - Those with other determined stroke etiologies, such as vasculitis, shock, antiphospholipid antibody syndrome etc.
  - Gastrointestinal bleeding or major surgery within 3 months prior to the index event.
  - History of nontraumatic intracranial hemorrhage.
  - Clear indication for anticoagulation during the study period (deep venous thrombosis, pulmonary embolism or hypercoagulable state).
  - Qualifying ischemic event induced by angiography or surgery.
  - Severe non-cardiovascular comorbidity with a life expectancy <3 months.
  - Contraindication to clopidogrel, aspirin, atorvastatin or rosuvastatin
    - Known allergy to clopidogrel, aspirin atorvastatin or rosuvastatin
    - Severe renal (serum creatinine >2 mg/dL) or hepatic insufficiency (INR >1.2; ALT >40 U/L or any

---

resultant complication, such as variceal bleeding, encephalopathy, or jaundice)

- Hemostatic disorder or systemic bleeding in the past 3 months
  - Current thrombocytopenia (platelet count  $<100 \times 10^9/L$ ) or leukopenia ( $<2 \times 10^9/L$ )
  - History of drug-induced hematologic or hepatic abnormalities
  - Anticipated requirement for long-term ( $>7$  day) non-study antiplatelet drugs (e.g., dipyridamole, ticagrelor, ticlopidine), or NSAIDs.
  - Not willing or able to discontinue prohibited concomitant medications.
  - Women of childbearing age not practicing reliable contraception who do not have a documented negative pregnancy test.
  - Other neurological conditions that would complicate assessment of outcomes during follow-up.
  - Ongoing treatment in another study of an investigational therapy, or treatment in such a study within the last 7 days.
-

**Historical control group**

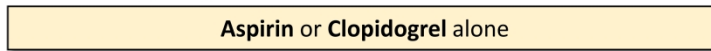

**Intervention group**

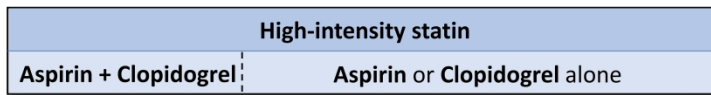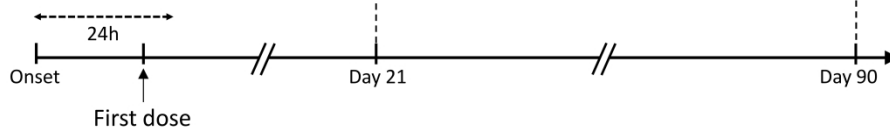

Figure 1/ A schematic diagram of the treatment schedule and study design

199x109mm (600 x 600 DPI)

# Reporting checklist for protocol of a clinical trial.

Based on the SPIRIT guidelines.

## Instructions to authors

Complete this checklist by entering the page numbers from your manuscript where readers will find each of the items listed below.

Your article may not currently address all the items on the checklist. Please modify your text to include the missing information. If you are certain that an item does not apply, please write "n/a" and provide a short explanation.

Upload your completed checklist as an extra file when you submit to a journal.

In your methods section, say that you used the SPIRIT reporting guidelines, and cite them as:

Chan A-W, Tetzlaff JM, Gøtzsche PC, Altman DG, Mann H, Berlin J, Dickersin K, Hróbjartsson A, Schulz KF, Parulekar WR, Krleža-Jerić K, Laupacis A, Moher D. SPIRIT 2013 Explanation and Elaboration: Guidance for protocols of clinical trials. *BMJ*. 2013;346:e7586

|                                   |                                                                                                                                 | Page   |
|-----------------------------------|---------------------------------------------------------------------------------------------------------------------------------|--------|
|                                   | Reporting Item                                                                                                                  | Number |
| <b>Administrative information</b> |                                                                                                                                 |        |
| Title                             | <a href="#">#1</a> Descriptive title identifying the study design, population, interventions, and, if applicable, trial acronym | 1      |

|    |                     |                     |                                                            |    |
|----|---------------------|---------------------|------------------------------------------------------------|----|
| 1  | Trial registration  | <a href="#">#2a</a> | Trial identifier and registry name. If not yet registered, | 3  |
| 2  |                     |                     | name of intended registry                                  |    |
| 3  |                     |                     |                                                            |    |
| 4  |                     |                     |                                                            |    |
| 5  |                     |                     |                                                            |    |
| 6  | Trial registration: | <a href="#">#2b</a> | All items from the World Health Organization Trial         | 3  |
| 7  | data set            |                     | Registration Data Set                                      |    |
| 8  |                     |                     |                                                            |    |
| 9  |                     |                     |                                                            |    |
| 10 |                     |                     |                                                            |    |
| 11 | Protocol version    | <a href="#">#3</a>  | Date and version identifier                                | 14 |
| 12 |                     |                     |                                                            |    |
| 13 |                     |                     |                                                            |    |
| 14 |                     |                     |                                                            |    |
| 15 | Funding             | <a href="#">#4</a>  | Sources and types of financial, material, and other        | 10 |
| 16 |                     |                     | support                                                    |    |
| 17 |                     |                     |                                                            |    |
| 18 |                     |                     |                                                            |    |
| 19 |                     |                     |                                                            |    |
| 20 | Roles and           | <a href="#">#5a</a> | Names, affiliations, and roles of protocol contributors    | 10 |
| 21 | responsibilities:   |                     |                                                            |    |
| 22 |                     |                     |                                                            |    |
| 23 | contributorship     |                     |                                                            |    |
| 24 |                     |                     |                                                            |    |
| 25 |                     |                     |                                                            |    |
| 26 |                     |                     |                                                            |    |
| 27 |                     |                     |                                                            |    |
| 28 | Roles and           | <a href="#">#5b</a> | Name and contact information for the trial sponsor         | 1  |
| 29 | responsibilities:   |                     |                                                            |    |
| 30 |                     |                     |                                                            |    |
| 31 | sponsor contact     |                     |                                                            |    |
| 32 | information         |                     |                                                            |    |
| 33 |                     |                     |                                                            |    |
| 34 |                     |                     |                                                            |    |
| 35 |                     |                     |                                                            |    |
| 36 |                     |                     |                                                            |    |
| 37 |                     |                     |                                                            |    |
| 38 | Roles and           | <a href="#">#5c</a> | Role of study sponsor and funders, if any, in study        | 10 |
| 39 | responsibilities:   |                     | design; collection, management, analysis, and              |    |
| 40 |                     |                     | interpretation of data; writing of the report; and the     |    |
| 41 | sponsor and funder  |                     | decision to submit the report for publication, including   |    |
| 42 |                     |                     | whether they will have ultimate authority over any of      |    |
| 43 |                     |                     | these activities                                           |    |
| 44 |                     |                     |                                                            |    |
| 45 |                     |                     |                                                            |    |
| 46 |                     |                     |                                                            |    |
| 47 |                     |                     |                                                            |    |
| 48 |                     |                     |                                                            |    |
| 49 |                     |                     |                                                            |    |
| 50 |                     |                     |                                                            |    |
| 51 |                     |                     |                                                            |    |
| 52 | Roles and           | <a href="#">#5d</a> | Composition, roles, and responsibilities of the            | 8  |
| 53 | responsibilities:   |                     | coordinating centre, steering committee, endpoint          |    |
| 54 |                     |                     | adjudication committee, data management team, and          |    |
| 55 | committees          |                     |                                                            |    |
| 56 |                     |                     |                                                            |    |
| 57 |                     |                     |                                                            |    |
| 58 |                     |                     |                                                            |    |
| 59 |                     |                     |                                                            |    |
| 60 |                     |                     |                                                            |    |



other individuals or groups overseeing the trial, if applicable (see Item 21a for data monitoring committee)

## Introduction

|                                                  |                     |                                                                                                                                                                                                            |   |
|--------------------------------------------------|---------------------|------------------------------------------------------------------------------------------------------------------------------------------------------------------------------------------------------------|---|
| Background and rationale                         | <a href="#">#6a</a> | Description of research question and justification for undertaking the trial, including summary of relevant studies (published and unpublished) examining benefits and harms for each intervention         | 4 |
| Background and rationale: choice of comparators  | <a href="#">#6b</a> | Explanation for choice of comparators                                                                                                                                                                      | 5 |
| Objectives                                       | <a href="#">#7</a>  | Specific objectives or hypotheses                                                                                                                                                                          | 5 |
| Trial design                                     | <a href="#">#8</a>  | Description of trial design including type of trial (eg, parallel group, crossover, factorial, single group), allocation ratio, and framework (eg, superiority, equivalence, non-inferiority, exploratory) | 5 |
| <b>Methods:</b>                                  |                     |                                                                                                                                                                                                            |   |
| <b>Participants, interventions, and outcomes</b> |                     |                                                                                                                                                                                                            |   |
| Study setting                                    | <a href="#">#9</a>  | Description of study settings (eg, community clinic, academic hospital) and list of countries where data will be collected. Reference to where list of study sites can be obtained                         | 5 |

|    |                      |                      |                                                              |    |
|----|----------------------|----------------------|--------------------------------------------------------------|----|
| 1  | Eligibility criteria | <a href="#">#10</a>  | Inclusion and exclusion criteria for participants. If        | 14 |
| 2  |                      |                      | applicable, eligibility criteria for study centres and       |    |
| 3  |                      |                      | individuals who will perform the interventions (eg,          |    |
| 4  |                      |                      | surgeons, psychotherapists)                                  |    |
| 5  |                      |                      |                                                              |    |
| 6  |                      |                      |                                                              |    |
| 7  |                      |                      |                                                              |    |
| 8  |                      |                      |                                                              |    |
| 9  |                      |                      |                                                              |    |
| 10 |                      |                      |                                                              |    |
| 11 | Interventions:       | <a href="#">#11a</a> | Interventions for each group with sufficient detail to allow | 6  |
| 12 |                      |                      | replication, including how and when they will be             |    |
| 13 | description          |                      | administered                                                 |    |
| 14 |                      |                      |                                                              |    |
| 15 |                      |                      |                                                              |    |
| 16 |                      |                      |                                                              |    |
| 17 |                      |                      |                                                              |    |
| 18 |                      |                      |                                                              |    |
| 19 | Interventions:       | <a href="#">#11b</a> | Criteria for discontinuing or modifying allocated            | 6  |
| 20 |                      |                      | interventions for a given trial participant (eg, drug dose   |    |
| 21 | modifications        |                      | change in response to harms, participant request, or         |    |
| 22 |                      |                      | improving / worsening disease)                               |    |
| 23 |                      |                      |                                                              |    |
| 24 |                      |                      |                                                              |    |
| 25 |                      |                      |                                                              |    |
| 26 |                      |                      |                                                              |    |
| 27 |                      |                      |                                                              |    |
| 28 |                      |                      |                                                              |    |
| 29 | Interventions:       | <a href="#">#11c</a> | Strategies to improve adherence to intervention protocols,   | 6  |
| 30 |                      |                      | and any procedures for monitoring adherence (eg, drug        |    |
| 31 | adherence            |                      | tablet return; laboratory tests)                             |    |
| 32 |                      |                      |                                                              |    |
| 33 |                      |                      |                                                              |    |
| 34 |                      |                      |                                                              |    |
| 35 |                      |                      |                                                              |    |
| 36 | Interventions:       | <a href="#">#11d</a> | Relevant concomitant care and interventions that are         | 6  |
| 37 |                      |                      | permitted or prohibited during the trial                     |    |
| 38 | concomitant care     |                      |                                                              |    |
| 39 |                      |                      |                                                              |    |
| 40 |                      |                      |                                                              |    |
| 41 |                      |                      |                                                              |    |
| 42 | Outcomes             | <a href="#">#12</a>  | Primary, secondary, and other outcomes, including the        | 7  |
| 43 |                      |                      | specific measurement variable (eg, systolic blood            |    |
| 44 |                      |                      | pressure), analysis metric (eg, change from baseline, final  |    |
| 45 |                      |                      | value, time to event), method of aggregation (eg, median,    |    |
| 46 |                      |                      | proportion), and time point for each outcome. Explanation    |    |
| 47 |                      |                      | of the clinical relevance of chosen efficacy and harm        |    |
| 48 |                      |                      | outcomes is strongly recommended                             |    |
| 49 |                      |                      |                                                              |    |
| 50 |                      |                      |                                                              |    |
| 51 |                      |                      |                                                              |    |
| 52 |                      |                      |                                                              |    |
| 53 |                      |                      |                                                              |    |
| 54 |                      |                      |                                                              |    |
| 55 |                      |                      |                                                              |    |
| 56 |                      |                      |                                                              |    |
| 57 |                      |                      |                                                              |    |
| 58 |                      |                      |                                                              |    |
| 59 |                      |                      |                                                              |    |
| 60 |                      |                      |                                                              |    |

|    |                           |                      |                                                            |    |
|----|---------------------------|----------------------|------------------------------------------------------------|----|
| 1  | Participant timeline      | <a href="#">#13</a>  | Time schedule of enrolment, interventions (including any   | 13 |
| 2  |                           |                      | run-ins and washouts), assessments, and visits for         |    |
| 3  |                           |                      | participants. A schematic diagram is highly recommended    |    |
| 4  |                           |                      | (see Figure)                                               |    |
| 5  |                           |                      |                                                            |    |
| 6  |                           |                      |                                                            |    |
| 7  |                           |                      |                                                            |    |
| 8  |                           |                      |                                                            |    |
| 9  |                           |                      |                                                            |    |
| 10 |                           |                      |                                                            |    |
| 11 | Sample size               | <a href="#">#14</a>  | Estimated number of participants needed to achieve         | 7  |
| 12 |                           |                      | study objectives and how it was determined, including      |    |
| 13 |                           |                      | clinical and statistical assumptions supporting any sample |    |
| 14 |                           |                      | size calculations                                          |    |
| 15 |                           |                      |                                                            |    |
| 16 |                           |                      |                                                            |    |
| 17 |                           |                      |                                                            |    |
| 18 |                           |                      |                                                            |    |
| 19 |                           |                      |                                                            |    |
| 20 |                           |                      |                                                            |    |
| 21 | Recruitment               | <a href="#">#15</a>  | Strategies for achieving adequate participant enrolment to | 7  |
| 22 |                           |                      | reach target sample size                                   |    |
| 23 |                           |                      |                                                            |    |
| 24 |                           |                      |                                                            |    |
| 25 |                           |                      |                                                            |    |
| 26 | <b>Methods:</b>           |                      |                                                            |    |
| 27 |                           |                      |                                                            |    |
| 28 | <b>Assignment of</b>      |                      |                                                            |    |
| 29 | <b>interventions (for</b> |                      |                                                            |    |
| 30 | <b>controlled trials)</b> |                      |                                                            |    |
| 31 |                           |                      |                                                            |    |
| 32 |                           |                      |                                                            |    |
| 33 |                           |                      |                                                            |    |
| 34 |                           |                      |                                                            |    |
| 35 |                           |                      |                                                            |    |
| 36 | Allocation: sequence      | <a href="#">#16a</a> | Method of generating the allocation sequence (eg,          | 5  |
| 37 | generation                |                      | computer-generated random numbers), and list of any        |    |
| 38 |                           |                      | factors for stratification. To reduce predictability of a  |    |
| 39 |                           |                      | random sequence, details of any planned restriction (eg,   |    |
| 40 |                           |                      | blocking) should be provided in a separate document that   |    |
| 41 |                           |                      | is unavailable to those who enrol participants or assign   |    |
| 42 |                           |                      | interventions                                              |    |
| 43 |                           |                      |                                                            |    |
| 44 |                           |                      |                                                            |    |
| 45 |                           |                      |                                                            |    |
| 46 |                           |                      |                                                            |    |
| 47 |                           |                      |                                                            |    |
| 48 |                           |                      |                                                            |    |
| 49 |                           |                      |                                                            |    |
| 50 |                           |                      |                                                            |    |
| 51 |                           |                      |                                                            |    |
| 52 |                           |                      |                                                            |    |
| 53 | Allocation                | <a href="#">#16b</a> | Mechanism of implementing the allocation sequence (eg,     | 5  |
| 54 | concealment               |                      | central telephone; sequentially numbered, opaque,          |    |
| 55 |                           |                      |                                                            |    |
| 56 |                           |                      |                                                            |    |
| 57 |                           |                      |                                                            |    |
| 58 | mechanism                 |                      |                                                            |    |
| 59 |                           |                      |                                                            |    |
| 60 |                           |                      |                                                            |    |

sealed envelopes), describing any steps to conceal the sequence until interventions are assigned

Allocation: [#16c](#) Who will generate the allocation sequence, who will enrol participants, and who will assign participants to interventions 5

Blinding (masking) [#17a](#) Who will be blinded after assignment to interventions (eg, trial participants, care providers, outcome assessors, data analysts), and how 5

Blinding (masking): [#17b](#) If blinded, circumstances under which unblinding is permissible, and procedure for revealing a participant's allocated intervention during the trial 5

**Methods: Data collection, management, and analysis**

Data collection plan [#18a](#) Plans for assessment and collection of outcome, baseline, and other trial data, including any related processes to promote data quality (eg, duplicate measurements, training of assessors) and a description of study instruments (eg, questionnaires, laboratory tests) along with their reliability and validity, if known. Reference to where data collection forms can be found, if not in the protocol 6

|    |                            |                      |                                                                |   |
|----|----------------------------|----------------------|----------------------------------------------------------------|---|
| 1  | Data collection plan:      | <a href="#">#18b</a> | Plans to promote participant retention and complete            | 6 |
| 2  |                            |                      |                                                                |   |
| 3  | retention                  |                      | follow-up, including list of any outcome data to be            |   |
| 4  |                            |                      | collected for participants who discontinue or deviate from     |   |
| 5  |                            |                      | intervention protocols                                         |   |
| 6  |                            |                      |                                                                |   |
| 7  |                            |                      |                                                                |   |
| 8  |                            |                      |                                                                |   |
| 9  |                            |                      |                                                                |   |
| 10 |                            |                      |                                                                |   |
| 11 | Data management            | <a href="#">#19</a>  | Plans for data entry, coding, security, and storage,           | 8 |
| 12 |                            |                      | including any related processes to promote data quality        |   |
| 13 |                            |                      | (eg, double data entry; range checks for data values).         |   |
| 14 |                            |                      | Reference to where details of data management                  |   |
| 15 |                            |                      | procedures can be found, if not in the protocol                |   |
| 16 |                            |                      |                                                                |   |
| 17 |                            |                      |                                                                |   |
| 18 | Statistics: outcomes       | <a href="#">#20a</a> | Statistical methods for analysing primary and secondary        | 7 |
| 19 |                            |                      | outcomes. Reference to where other details of the              |   |
| 20 |                            |                      | statistical analysis plan can be found, if not in the protocol |   |
| 21 |                            |                      |                                                                |   |
| 22 |                            |                      |                                                                |   |
| 23 | Statistics: additional     | <a href="#">#20b</a> | Methods for any additional analyses (eg, subgroup and          | 7 |
| 24 | analyses                   |                      | adjusted analyses)                                             |   |
| 25 |                            |                      |                                                                |   |
| 26 |                            |                      |                                                                |   |
| 27 |                            |                      |                                                                |   |
| 28 | Statistics: analysis       | <a href="#">#20c</a> | Definition of analysis population relating to protocol non-    | 7 |
| 29 | population and             |                      | adherence (eg, as randomised analysis), and any                |   |
| 30 | missing data               |                      | statistical methods to handle missing data (eg, multiple       |   |
| 31 |                            |                      | imputation)                                                    |   |
| 32 |                            |                      |                                                                |   |
| 33 |                            |                      |                                                                |   |
| 34 |                            |                      |                                                                |   |
| 35 |                            |                      |                                                                |   |
| 36 |                            |                      |                                                                |   |
| 37 | <b>Methods: Monitoring</b> |                      |                                                                |   |
| 38 |                            |                      |                                                                |   |
| 39 |                            |                      |                                                                |   |
| 40 |                            |                      |                                                                |   |
| 41 |                            |                      |                                                                |   |
| 42 |                            |                      |                                                                |   |
| 43 |                            |                      |                                                                |   |
| 44 |                            |                      |                                                                |   |
| 45 |                            |                      |                                                                |   |
| 46 |                            |                      |                                                                |   |
| 47 |                            |                      |                                                                |   |
| 48 |                            |                      |                                                                |   |
| 49 | Data monitoring:           | <a href="#">#21a</a> | Composition of data monitoring committee (DMC);                | 8 |
| 50 | formal committee           |                      | summary of its role and reporting structure; statement of      |   |
| 51 |                            |                      | whether it is independent from the sponsor and                 |   |
| 52 |                            |                      | competing interests; and reference to where further            |   |
| 53 |                            |                      |                                                                |   |
| 54 |                            |                      |                                                                |   |
| 55 |                            |                      |                                                                |   |
| 56 |                            |                      |                                                                |   |
| 57 |                            |                      |                                                                |   |
| 58 |                            |                      |                                                                |   |
| 59 |                            |                      |                                                                |   |
| 60 |                            |                      |                                                                |   |

1 details about its charter can be found, if not in the  
 2 protocol. Alternatively, an explanation of why a DMC is  
 3 not needed  
 4  
 5  
 6  
 7

|    |                      |                      |                                                              |   |
|----|----------------------|----------------------|--------------------------------------------------------------|---|
| 8  | Data monitoring:     | <a href="#">#21b</a> | Description of any interim analyses and stopping             | 8 |
| 9  | interim analysis     |                      | guidelines, including who will have access to these          |   |
| 10 |                      |                      | interim results and make the final decision to terminate     |   |
| 11 |                      |                      | the trial                                                    |   |
| 12 |                      |                      |                                                              |   |
| 13 |                      |                      |                                                              |   |
| 14 |                      |                      |                                                              |   |
| 15 |                      |                      |                                                              |   |
| 16 |                      |                      |                                                              |   |
| 17 |                      |                      |                                                              |   |
| 18 | Harms                | <a href="#">#22</a>  | Plans for collecting, assessing, reporting, and managing     | 8 |
| 19 |                      |                      | solicited and spontaneously reported adverse events and      |   |
| 20 |                      |                      | other unintended effects of trial interventions or trial     |   |
| 21 |                      |                      | conduct                                                      |   |
| 22 |                      |                      |                                                              |   |
| 23 |                      |                      |                                                              |   |
| 24 |                      |                      |                                                              |   |
| 25 |                      |                      |                                                              |   |
| 26 |                      |                      |                                                              |   |
| 27 |                      |                      |                                                              |   |
| 28 | Auditing             | <a href="#">#23</a>  | Frequency and procedures for auditing trial conduct, if      | 8 |
| 29 |                      |                      | any, and whether the process will be independent from        |   |
| 30 |                      |                      | investigators and the sponsor                                |   |
| 31 |                      |                      |                                                              |   |
| 32 |                      |                      |                                                              |   |
| 33 |                      |                      |                                                              |   |
| 34 |                      |                      |                                                              |   |
| 35 | <b>Ethics and</b>    |                      |                                                              |   |
| 36 | <b>dissemination</b> |                      |                                                              |   |
| 37 |                      |                      |                                                              |   |
| 38 |                      |                      |                                                              |   |
| 39 |                      |                      |                                                              |   |
| 40 |                      |                      |                                                              |   |
| 41 | Research ethics      | <a href="#">#24</a>  | Plans for seeking research ethics committee / institutional  | 8 |
| 42 | approval             |                      | review board (REC / IRB) approval                            |   |
| 43 |                      |                      |                                                              |   |
| 44 |                      |                      |                                                              |   |
| 45 |                      |                      |                                                              |   |
| 46 | Protocol             | <a href="#">#25</a>  | Plans for communicating important protocol modifications     | 8 |
| 47 | amendments           |                      | (eg, changes to eligibility criteria, outcomes, analyses) to |   |
| 48 |                      |                      | relevant parties (eg, investigators, REC / IRBs, trial       |   |
| 49 |                      |                      | participants, trial registries, journals, regulators)        |   |
| 50 |                      |                      |                                                              |   |
| 51 |                      |                      |                                                              |   |
| 52 |                      |                      |                                                              |   |
| 53 |                      |                      |                                                              |   |
| 54 |                      |                      |                                                              |   |
| 55 |                      |                      |                                                              |   |
| 56 |                      |                      |                                                              |   |
| 57 |                      |                      |                                                              |   |
| 58 |                      |                      |                                                              |   |
| 59 |                      |                      |                                                              |   |
| 60 |                      |                      |                                                              |   |

|    |                       |                      |                                                                |    |
|----|-----------------------|----------------------|----------------------------------------------------------------|----|
| 1  | Consent or assent     | <a href="#">#26a</a> | Who will obtain informed consent or assent from potential      | 8  |
| 2  |                       |                      | trial participants or authorised surrogates, and how (see      |    |
| 3  |                       |                      | Item 32)                                                       |    |
| 4  |                       |                      |                                                                |    |
| 5  |                       |                      |                                                                |    |
| 6  |                       |                      |                                                                |    |
| 7  |                       |                      |                                                                |    |
| 8  |                       |                      |                                                                |    |
| 9  | Consent or assent:    | <a href="#">#26b</a> | Additional consent provisions for collection and use of        | 8  |
| 10 | ancillary studies     |                      | participant data and biological specimens in ancillary         |    |
| 11 |                       |                      | studies, if applicable                                         |    |
| 12 |                       |                      |                                                                |    |
| 13 |                       |                      |                                                                |    |
| 14 |                       |                      |                                                                |    |
| 15 |                       |                      |                                                                |    |
| 16 | Confidentiality       | <a href="#">#27</a>  | How personal information about potential and enrolled          | 8  |
| 17 |                       |                      | participants will be collected, shared, and maintained in      |    |
| 18 |                       |                      | order to protect confidentiality before, during, and after     |    |
| 19 |                       |                      | the trial                                                      |    |
| 20 |                       |                      |                                                                |    |
| 21 |                       |                      |                                                                |    |
| 22 |                       |                      |                                                                |    |
| 23 |                       |                      |                                                                |    |
| 24 |                       |                      |                                                                |    |
| 25 |                       |                      |                                                                |    |
| 26 | Declaration of        | <a href="#">#28</a>  | Financial and other competing interests for principal          | 10 |
| 27 | interests             |                      | investigators for the overall trial and each study site        |    |
| 28 |                       |                      |                                                                |    |
| 29 |                       |                      |                                                                |    |
| 30 |                       |                      |                                                                |    |
| 31 |                       |                      |                                                                |    |
| 32 | Data access           | <a href="#">#29</a>  | Statement of who will have access to the final trial           | 8  |
| 33 |                       |                      | dataset, and disclosure of contractual agreements that         |    |
| 34 |                       |                      | limit such access for investigators                            |    |
| 35 |                       |                      |                                                                |    |
| 36 |                       |                      |                                                                |    |
| 37 |                       |                      |                                                                |    |
| 38 |                       |                      |                                                                |    |
| 39 | Ancillary and post    | <a href="#">#30</a>  | Provisions, if any, for ancillary and post-trial care, and for | 8  |
| 40 | trial care            |                      | compensation to those who suffer harm from trial               |    |
| 41 |                       |                      | participation                                                  |    |
| 42 |                       |                      |                                                                |    |
| 43 |                       |                      |                                                                |    |
| 44 |                       |                      |                                                                |    |
| 45 |                       |                      |                                                                |    |
| 46 |                       |                      |                                                                |    |
| 47 | Dissemination policy: | <a href="#">#31a</a> | Plans for investigators and sponsor to communicate trial       | 8  |
| 48 | trial results         |                      | results to participants, healthcare professionals, the         |    |
| 49 |                       |                      | public, and other relevant groups (eg, via publication,        |    |
| 50 |                       |                      | reporting in results databases, or other data sharing          |    |
| 51 |                       |                      | arrangements), including any publication restrictions          |    |
| 52 |                       |                      |                                                                |    |
| 53 |                       |                      |                                                                |    |
| 54 |                       |                      |                                                                |    |
| 55 |                       |                      |                                                                |    |
| 56 |                       |                      |                                                                |    |
| 57 |                       |                      |                                                                |    |
| 58 |                       |                      |                                                                |    |
| 59 |                       |                      |                                                                |    |
| 60 |                       |                      |                                                                |    |

1 Dissemination policy: [#31b](#) Authorship eligibility guidelines and any intended use of 8  
 2 authorship professional writers  
 3  
 4  
 5

6 Dissemination policy: [#31c](#) Plans, if any, for granting public access to the full 8  
 7 reproducible protocol, participant-level dataset, and statistical code  
 8  
 9  
 10  
 11 research  
 12  
 13

## 14 Appendices

15  
 16  
 17 Informed consent [#32](#) Model consent form and other related documentation n/a  
 18 materials given to participants and authorised surrogates  
 19  
 20  
 21

22  
 23 Biological specimens [#33](#) Plans for collection, laboratory evaluation, and storage of n/a  
 24 biological specimens for genetic or molecular analysis in  
 25 the current trial and for future use in ancillary studies, if  
 26  
 27 applicable  
 28  
 29  
 30  
 31

32  
 33 The SPIRIT Explanation and Elaboration paper is distributed under the terms of the Creative  
 34 Commons Attribution License CC-BY-NC. This checklist was completed on 08. June 2021 using  
 35 <https://www.goodreports.org/>, a tool made by the [EQUATOR Network](#) in collaboration with  
 36  
 37 [Penelope.ai](#)  
 38  
 39  
 40  
 41  
 42  
 43  
 44  
 45  
 46  
 47  
 48  
 49  
 50  
 51  
 52  
 53  
 54  
 55  
 56  
 57  
 58  
 59  
 60
